# Supplementary material
Source: HighWire-hosted journal article supplement (https://jitc.bmj.com/content/8/1/e000376)
Supplement: inline-supplementary-material-2 [file inline-supplementary-material-2.xlsx]

## Sheet: Supplementary Table 3
Normalized miRNA expression (Plasma)
	H1	H2	H3	H5	H6	H7	H9	P1	P2	P4	P6	P11	P3	P5	P9	P10	P1_2	P2_2	P4_2	P4_3	P6_2
hsa-let-7a-5p	38412.6	56597.4	64604.2	43668	44122.7	51795.3	33260.8	20372.7	29415.4	46060.2	30265.6	34425.9	29865.3	40924.3	24743.7	29596.7	27007.2	37230.1	28726.7	29027.5	20745.6
hsa-let-7a-3p	28.1256	226.273	66.894	59.5675	235.907	101.33	143.032	197.198	219.881	198.472	158.785	167.691	215.908	191.623	169.126	229.428	167.768	63.6639	124.685	164.457	260.712
hsa-let-7b-5p	125616	129626	166628	50726.7	69896.5	73604.1	50710.6	16244.5	28242.1	24888.6	46070.4	19370.1	31079.2	27982.7	28374.9	20630.1	38431.1	52777.4	38599.3	29932.9	36650.9
hsa-let-7b-3p	0	29.0094	51.4569	69.4954	142.695	31.0195	38.7027	82.943	18.0231	78.9459	60.5312	78.85	134.343	80.5834	60.8854	77.663	97.3578	50.4006	69.4967	70.2174	56.8606
hsa-let-7c-5p	1778.95	1792.78	1924.49	8503.26	9868.99	13034.4	7844.87	3346.37	5479.01	7771.38	6425.08	4598.68	5816.07	7644	4472.26	4424.12	4127.27	6732.46	4750.3	4370.11	3679.6
hsa-let-7d-5p	1497.69	2088.68	2742.65	2199.03	3538.61	4611.57	2256.54	3839.7	3573.97	6494.96	2771.28	5373.14	3284.67	4876.88	4090.6	3570.72	3192.81	3748.21	3495.27	3549.67	2229.66
hsa-let-7d-3p	3522.73	2338.16	3998.2	1747.31	2800.97	1862.2	1670.95	5797.02	4037.16	2869.35	3893.3	3957.08	3347.05	2686.54	2401.59	4219.84	6549.92	3419.28	4672.63	5332.83	6405.28
hsa-let-7e-5p	625.795	1218.4	638.066	526.18	819.347	789.963	526.693	461.35	520.866	856.6	652.685	1302.11	435.654	863.575	796.584	571.235	974.447	618.071	956.601	938.696	415.566
hsa-let-7e-3p	0	0	0	34.7477	0	0	15.1445	2.99794	0	0	0	15.1219	0	5.07612	2.25501	5.78578	0	0	6.13206	0	0
hsa-let-7f-5p	27120.1	32391.9	41474.3	25142.5	26849.7	34830.8	22185.1	20027.9	22271.1	44972.6	25016.9	26097.5	26430	39000.4	15313.8	29200.8	25645.1	31813.4	26846.2	28173.8	17719.9
hsa-let-7f-1-3p	0	0	0	14.8919	3.4523	0	0	18.6539	25.2323	19.9209	0	14.0418	0	23.477	20.8589	14.0194	19.9931	7.95799	10.2201	5.54348	16.3323
hsa-let-7f-2-3p	0	0	0	0	0	0	0	0.666209	18.0231	2.95125	0.877264	8.6411	0.959589	12.6903	0.563754	4.67313	7.82339	0	0	0	8.46859
hsa-let-7g-5p	10392.4	13228.3	15344.5	14311.1	19467.5	22619.4	13261.6	9211.34	12453.9	15325.1	14881	11861.3	14939.8	16161.1	9303.63	9844.06	9144.68	12968.9	9741.8	9159.67	8882.95
hsa-let-7i-5p	52763.7	53690.6	71375.9	22104.5	56439.4	82416.7	53884.3	39149.4	35992	52080	41349.9	57806.2	33300.6	44551.8	65782.7	52101.4	74737.7	81349.3	74112.1	72360.9	59321.9
hsa-let-7i-3p	0	0	0	19.8558	31.0707	14.4758	0	0	7.20922	10.3294	7.89538	2.16027	6.71713	0	6.76504	2.67036	15.6468	0	0	0	7.8637
hsa-miR-1-3p	1026.59	388.726	10.2914	312.729	69.0461	4.13593	1.68273	27.3146	115.348	61.9763	84.2174	72.3692	19.1918	72.3347	95.2744	83.6713	56.5023	135.286	61.3206	120.109	38.7136
hsa-miR-100-5p	12740.9	2262.73	2886.73	819.053	1363.66	1391.74	617.561	123.915	939.001	681.739	1020.26	937.289	1541.1	1696.06	288.078	478.885	52.156	557.059	359.747	234.674	217.764
hsa-miR-101-3p	5020.42	6782.4	7697.96	11362.5	11720.6	12455.4	3671.71	3353.03	5563.72	3384.35	5846.97	3863.38	7151.82	3436.53	2606.8	4143.95	2292.25	4562.58	2015.4	1742.5	3835.67
hsa-miR-103a-3p	1153.15	1259.01	1435.65	908.405	2752.64	2378.16	684.87	1582.25	1313.88	2314.52	1641.36	1956.94	1663.93	1706.84	1724.52	1652.95	1316.94	1382.04	1324.52	1432.07	1162.62
hsa-miR-106a-5p	281.256	626.603	627.775	9.92792	60.9907	61.005	47.1163	26.9815	52.2669	39.1041	39.4769	23.763	56.6158	26.0151	6.76504	19.3601	12.1697	45.0953	4.08804	49.8913	22.3813
hsa-miR-106b-5p	0	127.641	231.556	109.207	120.831	158.199	85.8191	112.922	120.754	95.9156	142.994	76.4197	177.524	107.233	70.4692	62.5309	57.3715	58.3586	112.421	62.8261	128.844
hsa-miR-106b-3p	639.858	725.235	849.039	625.459	772.165	842.696	708.428	1027.29	796.619	821.185	1073.77	1027.48	1087.21	717.636	957.254	769.954	1072.67	859.463	825.784	864.783	964.21
hsa-miR-107	358.602	464.151	360.199	471.576	1197.95	796.167	215.389	282.473	346.043	355.626	661.457	359.956	603.582	217.004	376.024	261.473	177.33	297.098	186.006	168.152	370.199
hsa-miR-10a-5p	6398.58	12201.4	5603.66	4810.08	10873.6	10092.7	6365.75	2907.67	7930.14	3196.2	5957.5	3258.77	7348.53	7173.82	2930.96	2670.36	2965.07	6342.52	2508.01	1472.72	2086.3
hsa-miR-10a-3p	0	46.4151	0	4.96396	34.523	0	0	12.658	1.80231	2.21344	0	3.78048	112.272	18.4009	2.81877	12.0166	3.47706	0	0	0	12.7029
hsa-miR-10b-5p	12593.2	29873.9	11361.7	10131.4	25112.1	17728.7	14372.2	2173.51	16680.3	5988.09	15092.5	3785.34	12945.8	13190.3	5343.26	2509.92	1851.54	14656	3883.64	1334.13	1827.4
hsa-miR-10b-3p	0	29.0094	0	14.8919	5.75384	11.3738	0	2.66484	10.8138	27.2991	38.5996	5.13065	142.979	17.1319	12.4026	5.56325	0	0	0	0	7.2588
hsa-miR-1180-3p	175.785	348.113	437.384	188.63	342.929	372.234	237.264	60.2919	70.2899	98.8669	283.356	101.263	155.453	74.2382	138.12	67.2041	38.2477	241.392	83.8048	51.7391	163.928
hsa-miR-1183	70.3141	75.4245	25.7285	14.8919	0	0	0	0	0	0	0	0	0	0	0	0	0	0	0	0	0
hsa-miR-1185-1-3p	0	0	0	0	0	20.6797	0	15.989	16.2207	9.59156	0	7.02089	6.71713	6.34515	7.3288	15.3546	6.08486	23.874	0	14.7826	10.8882
hsa-miR-1185-2-3p	0	0	0	0	0	18.6117	0	0	0	0.737813	0	0	0	0	0	0.66759	6.08486	0	0	0	0
hsa-miR-1197	0	0	0	0	0	0	0	0	0	0	0	1.08014	0	0	0	5.56325	6.08486	0	0	0	0
hsa-miR-122-5p	118275	26485.6	115536	23971	290723	121590	35330.5	20655.8	226876	58033.4	190771	64937.3	175693	45542.3	72683.1	52674.9	15630.3	121476	106665	40230.9	66407.7
hsa-miR-122-3p	0	0	0	0	10.3569	0	0	0.333105	16.2207	5.9025	57.8994	11.0714	15.3534	12.0558	0	2.44783	0	0	14.3081	3.69565	11.4931
hsa-miR-1224-5p	7.03141	0	15.4371	4.96396	12.6584	17.5777	0	1.33242	0	8.11594	0	3.51045	41.2623	3.80709	7.89255	3.33795	3.47706	0	14.3081	1.84783	12.7029
hsa-miR-1226-3p	0	0	5.14569	0	0	0	0	13.6573	0	15.4941	0	6.75086	13.4343	4.4416	15.2214	9.56879	13.039	0	18.3962	3.69565	5.4441
hsa-miR-1228-5p	189.848	185.66	51.4569	24.8198	51.7846	77.5488	0	111.59	72.0922	64.9275	243.002	13.2317	730.247	62.1824	20.8589	27.1487	41.7248	23.874	24.5282	29.5652	49.6018
hsa-miR-1229-3p	98.4397	0	15.4371	0	0	9.30585	0	34.6429	3.60461	11.0672	45.6177	6.75086	16.313	3.17257	15.7851	14.687	40.8555	0	40.8804	25.8696	30.8499
hsa-miR-1246	175.785	145.047	87.4768	163.811	57.5384	41.3593	70.6745	13.3242	223.486	36.8906	75.4447	73.4493	74.848	411.166	213.663	340.693	19.9931	29.1793	28.6163	3.69565	10.2833
hsa-miR-1248	246.099	87.0282	0	0	0	0	0	0	0	0	0	0	0	0	0	0	0	0	0	0	0
hsa-miR-1249-3p	0	0	10.2914	0	0	0	0	5.32967	19.8254	10.3294	20.1771	10.8014	9.59589	5.07612	16.3489	6.45337	12.1697	10.6107	8.17608	5.54348	32.0597
hsa-miR-1250-5p	0	0	0	0	0	0	0	5.66278	16.2207	2.95125	7.89538	11.3414	0	13.3248	3.38252	4.22807	6.95413	15.916	2.04402	11.087	0
hsa-miR-1254	0	0	0	0	0	0	0	8.32761	0	12.5428	0	2.70034	0	4.4416	22.5501	8.67867	6.08486	0	8.17608	9.23913	0
hsa-miR-1255a	0	0	0	0	17.2615	21.7137	1.68273	2.66484	0	0	5.26359	7.29093	4.79795	0	14.6576	11.7941	10.4312	0	0	1.84783	13.9127
hsa-miR-1255b-5p	0	23.2075	25.7285	9.92792	73.6492	53.7671	43.7509	2.99794	0	12.5428	24.5634	18.6324	51.8178	0.634515	27.6239	6.23084	6.08486	58.3586	2.04402	3.69565	6.049
hsa-miR-125a-5p	5224.34	8221.27	5022.2	3837.14	6641.08	4319.98	3646.47	2009.62	5183.43	2456.18	4998.65	3044.64	2659.98	3940.97	1562.73	1446.45	2978.1	5204.53	2777.82	2468.7	1434.82
hsa-miR-125a-3p	0	0	0	44.6756	16.1108	41.3593	31.9718	11.6587	21.6277	6.64031	9.64991	18.3623	26.8685	7.61418	23.6777	14.4645	6.08486	2.65266	16.3522	11.087	8.46859
hsa-miR-125b-5p	485.167	481.556	560.881	431.864	486.775	485.972	277.65	286.137	852.49	324.638	811.47	298.388	1638.02	887.052	245.797	216.077	96.4885	257.308	106.289	55.4348	79.2419
hsa-miR-125b-1-3p	0	0	0	0	5.75384	0	28.6064	0	0	4.42688	0	6.21079	18.2322	12.6903	3.94628	3.78301	0	0	6.13206	0	0
hsa-miR-125b-2-3p	35.157	46.4151	0	44.6756	46.0307	0	74.04	10.6593	0	4.42688	0	6.75086	45.1007	7.61418	10.1476	4.00554	0.869266	13.2633	24.5282	0	7.2588
hsa-miR-126-5p	63.2827	800.66	560.881	883.585	818.196	581.099	417.316	1397.71	1400.39	1690.33	825.506	940.529	900.095	1505.7	598.706	1358.77	746.699	917.822	1024.05	938.696	1040.43
hsa-miR-126-3p	30818.7	42371.1	33076.5	23876.6	49187.3	49525.7	48228.6	23547.2	38454	44227.4	36857.4	30042.4	26100.8	44311.3	55912	35480	32096.8	45320.8	42525.8	36725.5	24844.4
hsa-miR-1260a	0	0	0	34.7477	16.1108	15.5098	0	19.6532	0	14.0184	15.7908	34.2944	4.79795	19.67	16.3489	24.4783	26.9472	18.5686	10.2201	27.7174	41.1332
hsa-miR-1260b	0	0	0	9.92792	12.6584	15.5098	0	84.9416	34.2438	28.0369	35.9678	148.519	9.59589	69.7966	30.4427	100.806	93.0114	148.549	51.1005	85	109.487
hsa-miR-1262	0	0	10.2914	0	0	23.7816	0	0	0	0	0	0	0	0	0	0	0	0	0	0	0
hsa-miR-1265	0	0	10.2914	0	0	0	0	0	0	0	0	0	10.5555	0	0	0	0	0	0	0	0
hsa-miR-127-5p	0	0	0	4.96396	12.6584	1.03398	0	13.3242	0	0	0	4.59058	0	0	5.63754	7.56602	0	0	28.6163	1.84783	0
hsa-miR-127-3p	365.633	92.8301	308.742	119.135	199.083	330.875	223.803	700.186	185.637	471.462	212.298	460.138	498.986	195.431	390.118	560.776	986.617	421.774	433.332	639.348	388.346
hsa-miR-1270	0	23.2075	0	0	0	0	0	0	0	0	19.2998	3.24041	0	1.90354	4.51003	0	2.6078	7.95799	0	3.69565	0
hsa-miR-1271-5p	0	0	5.14569	0	11.5077	16.5437	0	21.6518	0	13.2806	19.2998	14.8519	13.4343	12.6903	11.8388	12.2392	6.95413	0	0	14.7826	8.46859
hsa-miR-1273a	0	0	0	4.96396	8.05538	0	0	0.333105	0	0	0	0	0	0	0	0	0	0	0	0	0
hsa-miR-1273c	0	0	0	0	0	0	0	0	0	4.42688	7.01811	0	0	5.07612	1.69126	1.78024	0	0	4.08804	0	0
hsa-miR-1273d	0	0	0	0	0	0	0	0.666209	0	5.16469	0	5.13065	0	0	6.20129	0	0	0	6.13206	11.087	0
hsa-miR-1273g-3p	0	0	0	0	24.1661	3.10195	0	1.33242	28.8369	0.737813	4.38632	1.35017	1.91918	0	1.12751	1.11265	12.1697	7.95799	0	0	1.8147
hsa-miR-1273h-5p	84.3769	0	30.8742	9.92792	0	21.7137	0	93.9355	32.4415	54.5981	30.7043	68.0486	23.9897	58.3754	46.2278	53.6297	116.482	5.30533	81.7608	60.9783	93.1545
hsa-miR-1273h-3p	49.2198	5.80188	82.3311	4.96396	51.7846	76.5148	1.68273	309.121	68.4876	181.502	160.539	260.313	96.9185	168.146	214.79	252.349	278.165	37.1373	271.855	303.044	339.954
hsa-miR-1277-5p	0	0	0	9.92792	5.75384	0	0	16.9883	14.4184	27.2991	10.5272	14.0418	18.2322	32.9948	20.8589	16.6898	12.1697	2.65266	4.08804	24.0217	16.3323
hsa-miR-1277-3p	0	0	0	0	0	0	0	5.32967	0	1.47563	0	2.16027	0	3.80709	8.45631	3.78301	3.47706	0	2.04402	0	5.4441
hsa-miR-1278	0	0	0	0	4.60307	0	0	0.666209	0	11.0672	24.5634	5.13065	2.87877	19.67	4.51003	7.78855	0	18.5686	14.3081	12.9348	0
hsa-miR-128-1-5p	0	0	0	0	0	3.10195	0	0	0	0	0	1.35017	0	10.1522	0	4.22807	0	0	0	3.69565	0
hsa-miR-128-3p	2925.07	2918.35	4039.37	1831.7	3058.74	3441.1	2581.3	6862.62	3597.4	4937.44	4536.33	9166.04	2823.11	5152.89	9091.09	8488.41	10341.7	6398.23	8756.58	8974.89	11981.2
hsa-miR-1284	0	0	0	24.8198	20.7138	0	0	9.99314	3.60461	11.0672	0	13.2317	7.67671	10.1522	11.2751	11.5716	7.82339	0	6.13206	9.23913	7.2588
hsa-miR-1285-3p	0	0	5.14569	84.3873	52.9353	17.5777	0	12.9911	25.2323	5.16469	35.9678	22.9529	52.7774	13.9593	36.644	19.1376	4.34633	13.2633	4.08804	9.23913	15.7274
hsa-miR-1287-5p	0	0	0	9.92792	0	39.2914	0	45.6353	59.4761	16.9697	0	32.6741	32.626	6.97966	36.0802	38.0526	40.8555	0	24.5282	22.1739	39.3185
hsa-miR-1288-3p	0	0	0	0	0	7.23788	0	0	0	0	13.159	1.35017	0	0	0	3.11542	1.73853	0	8.17608	0	7.2588
hsa-miR-129-5p	0	0	0	4.96396	20.7138	9.30585	10.0964	1.99863	14.4184	5.9025	11.4044	21.3327	14.3938	10.7867	59.7579	5.11819	11.3005	2.65266	0	7.39131	4.8392
hsa-miR-1290	35.157	139.245	36.0199	64.5315	17.2615	16.5437	45.4336	10.3262	153.196	20.6588	35.0906	35.9146	45.1007	185.278	100.912	135.298	8.69266	21.2213	6.13206	1.84783	10.2833
hsa-miR-1292-5p	0	0	10.2914	4.96396	42.5784	10.3398	30.2891	72.2837	32.4415	50.1713	10.5272	42.3954	65.2521	54.5683	32.6977	38.9428	30.4243	18.5686	36.7924	94.2391	36.8989
hsa-miR-1294	42.1884	75.4245	41.1656	29.7838	12.6584	39.2914	53.8472	6.32899	3.60461	0	35.0906	13.5017	27.8281	6.34515	16.3489	27.8163	6.95413	23.874	20.4402	16.6304	40.5283
hsa-miR-1296-5p	0	0	0	0	0	0	0	14.6566	16.2207	2.95125	0	0.810103	7.67671	2.53806	5.63754	1.11265	7.82339	0	0	0	1.8147
hsa-miR-1298-5p	7.03141	5.80188	0	0	3.4523	16.5437	33.6545	0	0	2.21344	14.9135	3.24041	0	2.53806	0	1.78024	2.6078	0	0	0	0
hsa-miR-1299	0	0	51.4569	0	6.90461	21.7137	0	16.6552	14.4184	19.1831	5.26359	16.4721	31.6664	3.80709	178.71	3.33795	52.156	0	0	3.69565	32.6646
hsa-miR-1301-3p	98.4397	150.849	133.788	39.7117	147.298	189.219	176.686	830.763	311.799	793.886	467.582	754.206	247.574	562.815	582.921	560.331	947.5	578.281	733.803	840.761	683.537
hsa-miR-1303	0	0	15.4371	0	14.96	13.4418	0	7.6614	0	5.9025	0	12.1515	21.111	6.97966	3.38252	4.00554	4.34633	0	0	1.84783	0
hsa-miR-1304-5p	0	17.4056	36.0199	0	1.15077	36.1894	0	1.99863	0	6.64031	2.63179	4.05051	0	8.88321	19.1676	4.89566	3.47706	0	0	1.84783	7.8637
hsa-miR-1304-3p	0	5.80188	0	0	0	0	0	24.9828	28.8369	13.2806	14.9135	17.0122	21.111	19.0354	6.76504	22.253	10.4312	0	28.6163	25.8696	10.2833
hsa-miR-1306-5p	0	0	0	0	21.8646	1.03398	0	23.9835	32.4415	7.37813	32.4588	8.6411	10.5555	19.67	0.563754	11.7941	18.2546	47.748	12.2641	22.1739	23.5911
hsa-miR-1306-3p	84.3769	92.8301	15.4371	0	4.60307	2.06797	0	21.3187	0	20.6588	0	32.4041	19.1918	15.8629	37.7715	28.2613	49.5482	42.4426	36.7924	12.9348	38.7136
hsa-miR-1307-5p	0	0	0	19.8558	11.5077	7.23788	26.9236	55.9616	0	16.9697	7.01811	26.4634	17.2726	10.7867	28.1877	35.1597	29.555	5.30533	14.3081	27.7174	26.6156
hsa-miR-1307-3p	892.989	1328.63	1816.43	680.062	1617.98	1711.24	1426.95	7404.25	2903.51	4584.03	4377.55	4477.71	2103.42	2949.22	5851.76	4935.27	6452.56	4018.79	5839.76	6487.72	5637.06
hsa-miR-130a-3p	0	0	0	14.8919	19.5631	16.5437	0	44.636	30.6392	42.0553	35.0906	52.1166	0	26.6496	30.4427	44.7285	30.4243	21.2213	26.5723	22.1739	72.588
hsa-miR-130b-5p	0	40.6132	174.954	44.6756	56.3876	154.064	74.04	384.403	171.219	348.985	374.592	346.454	149.696	315.988	408.158	357.161	386.823	212.213	322.955	255	343.583
hsa-miR-130b-3p	0	40.6132	0	0	8.05538	12.4078	0	18.3207	5.40692	10.3294	0	17.5522	57.5754	7.61418	40.0265	15.132	3.47706	34.4846	14.3081	0	18.7519
hsa-miR-132-5p	0	0	0	14.8919	0	1.03398	0	3.99725	9.01153	12.5428	0	5.67072	0	0	4.51003	1.78024	0	50.4006	8.17608	3.69565	0
hsa-miR-132-3p	63.2827	0	72.0397	0	0	7.23788	0	0.666209	7.20922	1.47563	0	7.83099	0	6.97966	14.6576	11.5716	9.56192	0	0	11.087	7.2588
hsa-miR-1323	0	0	0	14.8919	9.20614	0	0	0	0	0	0	0	0	3.80709	0	0	0	0	0	0	0
hsa-miR-133a-3p	0	34.8113	0	24.8198	33.3723	0	0	13.9904	14.4184	35.415	28.0725	29.9738	8.6363	23.477	10.7113	41.1681	13.039	0	40.8804	31.413	1.2098
hsa-miR-133b	0	0	0	14.8919	4.60307	0	0	0.999314	9.01153	6.64031	2.63179	4.86062	0.959589	3.17257	2.25501	4.22807	0	0	0	1.84783	0
hsa-miR-134-5p	140.628	110.236	195.536	79.4234	113.926	90.9905	164.907	500.989	183.835	189.618	128.081	290.017	164.09	104.06	167.999	419.024	653.688	310.362	237.106	325.217	479.081
hsa-miR-1343-3p	0	0	10.2914	19.8558	0	0	0	10.3262	12.6161	12.5428	17.5453	14.5819	4.79795	13.3248	23.1139	15.7996	11.3005	0	44.9684	20.3261	13.3078
hsa-miR-135a-5p	0	0	25.7285	0	9.20614	8.27187	0	0	0	2.21344	0	0.810103	2.87877	3.17257	0	0.44506	0	0	0	0	5.4441
hsa-miR-135a-3p	0	0	0	0	0	0	0	0	0	0	12.2817	0.540069	0	0	4.51003	1.55771	0.869266	18.5686	0	0	0
hsa-miR-136-5p	0	0	0	0	0	0	0	4.33036	0	3.68906	0	2.97038	0	3.80709	0	6.89843	12.1697	0	6.13206	7.39131	21.7764
hsa-miR-136-3p	63.2827	104.434	0	0	0	38.2574	38.7027	32.3111	0	11.805	7.89538	6.21079	3.83836	3.80709	3.38252	8.67867	11.3005	0	0	5.54348	7.8637
hsa-miR-139-5p	478.136	1491.08	730.689	804.161	1739.96	1305.92	1290.65	497.658	1456.26	1342.82	1551.88	832.786	899.135	1311.54	1156.26	651.79	737.137	1604.86	1510.53	994.131	830.527
hsa-miR-139-3p	302.35	852.877	782.145	342.513	745.698	387.744	726.938	308.788	614.586	742.977	457.055	604.607	316.664	507.612	487.647	443.502	864.92	758.662	1269.34	1154.89	813.59
hsa-miR-140-5p	210.942	185.66	128.642	104.243	187.575	218.17	45.4336	413.716	160.405	263.399	286.865	228.179	235.099	348.349	118.388	266.368	252.956	233.434	298.427	286.413	325.436
hsa-miR-140-3p	1420.34	1183.58	1188.66	1166.53	1814.76	2051.42	1036.56	2276.1	1598.64	1887.32	2003.67	2097.36	1751.25	1671.95	1576.26	2008.11	1972.36	1498.76	2091.03	2418.8	2494
hsa-miR-141-3p	0	0	5.14569	4.96396	0	0	0	0	0	2.95125	0	0.810103	5.75754	3.80709	0	0.66759	0	18.5686	0	0	6.049
hsa-miR-142-5p	2039.11	3556.55	3828.4	4571.81	5280.87	5035.5	2971.7	2136.53	2979.21	2202.37	4556.51	1708.24	4127.19	2401.64	1473.65	1358.99	944.892	2098.26	1197.8	1193.7	2287.13
hsa-miR-142-3p	464.073	359.717	643.212	297.838	676.652	1128.08	705.062	913.706	767.782	1292.65	765.852	738.004	572.875	979.056	951.053	717.214	1059.64	970.875	907.545	920.217	814.8
hsa-miR-143-5p	154.691	0	0	9.92792	0	0	0	3.33105	0	2.95125	0	5.13065	6.71713	3.80709	4.51003	5.34072	0	0	0	5.54348	0
hsa-miR-143-3p	7558.76	4026.51	4564.23	2020.33	2853.9	1252.15	1076.94	2959.97	4619.31	2404.53	2762.51	2975.78	2875.89	3865.46	1837.27	5473.13	2826.85	5904.83	2922.95	2792.07	3542.29
hsa-miR-144-5p	984.397	731.037	1188.66	833.945	975.851	1751.57	839.681	106.927	291.973	416.864	450.914	45.6358	414.543	189.085	136.992	127.955	29.555	153.855	136.949	46.1957	76.2174
hsa-miR-144-3p	1455.5	1711.56	2444.2	2273.49	1819.36	3866.06	1551.47	185.539	383.891	603.531	763.22	88.0312	667.874	244.923	193.931	209.178	76.4954	305.056	239.15	53.587	144.571
hsa-miR-145-5p	154.691	98.632	102.914	0	0	0	0	0	0	7.37813	8.77264	3.78048	3.83836	0.634515	3.94628	2.44783	0	0	0	5.54348	16.3323
hsa-miR-145-3p	0	81.2264	25.7285	39.7117	31.0707	29.9855	0	52.9636	93.7199	68.6166	60.5312	35.6445	136.262	62.817	37.2077	78.3306	38.2477	47.748	44.9684	29.5652	61.0949
hsa-miR-1468-5p	7.03141	0	51.4569	0	18.4123	1.03398	0	26.9815	1.80231	12.5428	0.877264	26.4634	6.71713	5.07612	17.4764	24.2558	34.7706	58.3586	26.5723	11.087	42.9479
hsa-miR-1469	0	0	0	0	14.96	10.3398	0	0	0	0	0	0.270034	0	0	0	0	0	0	0	0	0
hsa-miR-146a-5p	1230.5	2175.71	1517.98	1757.24	3132.39	2261.32	1763.5	12312.2	7820.2	9049.27	6188.22	11599.9	5469.66	9783.58	6502.9	11096.2	6875.89	7729.86	5913.35	7237.94	12560.1
hsa-miR-146a-3p	0	0	0	0	0	0	0	20.9856	10.8138	11.0672	12.2817	32.1341	0	10.7867	10.7113	31.1542	19.1238	10.6107	28.6163	12.9348	16.9372
hsa-miR-146b-5p	4879.8	3968.49	3684.32	992.792	3491.43	3276.69	3718.83	2889.02	3096.36	4311.04	3860.84	4545.49	2310.69	3258.23	2828.92	4475.75	3736.1	4223.04	4940.4	4693.48	3816.92
hsa-miR-146b-3p	0	0	0	0	13.8092	14.4758	87.5018	6.66209	0	15.4941	14.0362	26.1933	12.4747	31.7257	23.1139	14.4645	13.039	18.5686	14.3081	7.39131	4.8392
hsa-miR-148a-5p	0	46.4151	25.7285	59.5675	49.483	56.8691	0	113.256	81.1037	112.148	61.4085	169.311	6.71713	88.1975	89.6368	138.414	106.92	7.95799	94.0249	103.478	82.2664
hsa-miR-148a-3p	28540.5	21397.3	29294.4	7376.44	23648.3	18271.5	14316.6	25379.9	18522.3	20726.6	18412	35388.8	14315.2	23800	28472.9	44650.2	31528.3	19377.7	38208.9	31440.8	39338.4
hsa-miR-148b-5p	56.2513	29.0094	30.8742	24.8198	18.4123	41.3593	26.9236	17.6545	14.4184	43.5309	7.89538	15.392	23.0301	7.61418	18.6039	17.1348	26.9472	15.916	36.7924	25.8696	14.5176
hsa-miR-148b-3p	970.334	644.009	885.059	560.927	842.362	1065	708.428	2244.46	1618.47	2476.1	1368.53	1616.97	1086.26	2078.04	1832.2	2482.54	2494.79	1676.48	2105.34	2396.63	2974.29
hsa-miR-149-5p	21.0942	0	0	0	0	11.3738	0	4.66346	25.2323	0.737813	0	3.78048	0	9.51772	13.5301	3.56048	0	0	0	9.23913	4.2343
hsa-miR-150-5p	527.356	986.32	931.371	1275.74	1131.2	1024.68	1223.34	136.573	648.83	322.424	979.904	243.841	678.43	463.196	283.004	50.2918	105.181	395.247	177.83	90.5435	99.8084
hsa-miR-150-3p	358.602	324.905	267.576	203.522	254.32	178.879	144.714	36.9746	93.7199	51.6469	119.308	39.425	123.787	58.3754	100.348	18.47	29.555	58.3586	38.8364	31.413	19.9617
hsa-miR-151a-5p	0	11.6038	56.6026	4.96396	46.0307	37.2234	57.2127	152.895	86.5107	181.502	106.149	137.177	59.4945	167.512	156.724	122.169	164.291	156.507	85.8488	123.804	132.473
hsa-miR-151a-3p	8972.08	7780.32	14932.8	4651.23	10699.8	9718.41	8317.72	22600.1	13153.2	17954.7	16468.9	34995.9	8073.02	17576.7	32312.1	28119.8	33952.7	20918.9	30067.5	26616.1	38070.6
hsa-miR-151b	0	11.6038	56.6026	4.96396	46.0307	37.2234	57.2127	152.895	86.5107	180.026	106.149	135.827	59.4945	167.512	156.16	121.946	164.291	156.507	85.8488	123.804	128.844
hsa-miR-152-5p	0	0	0	0	0	0	0	2.66484	0	0	0	1.89024	0	0	0	0	6.95413	10.6107	12.2641	1.84783	0
hsa-miR-152-3p	400.79	313.302	231.556	277.982	219.797	226.442	132.935	502.655	313.601	669.196	385.119	647.542	464.441	604.693	300.481	556.102	437.241	355.457	412.892	389.891	332.09
hsa-miR-1538	0	0	0	0	0	0	0	7.6614	0	7.37813	7.01811	4.86062	3.83836	0	0	2.2253	3.47706	0	14.3081	5.54348	9.67839
hsa-miR-155-5p	2299.27	1746.37	823.311	1156.6	1014.98	732.06	1531.28	267.483	1384.17	489.908	1072.89	317.56	610.299	527.282	447.057	196.717	329.452	1042.5	329.087	260.544	274.02
hsa-miR-15a-5p	0	34.8113	0	14.8919	55.2369	32.0535	0	24.9828	0	28.7747	26.3179	9.99127	10.5555	36.1673	22.5501	13.1293	6.95413	7.95799	12.2641	7.39131	26.6156
hsa-miR-15b-5p	0	52.2169	15.4371	99.2792	81.7045	116.84	102.646	39.3063	41.453	59.025	84.2174	33.7543	101.716	51.3957	65.3954	32.9344	68.672	79.5799	71.5407	31.413	75.6125
hsa-miR-15b-3p	0	75.4245	72.0397	59.5675	44.88	112.704	6.73091	45.3022	90.1153	64.1897	39.4769	36.4546	114.191	75.5072	60.3216	48.7341	39.9862	2.65266	18.3962	18.4783	68.9586
hsa-miR-16-5p	801.58	673.018	1682.64	1206.24	1100.13	1300.75	770.689	531.968	744.352	733.386	936.918	589.485	760.954	685.276	577.284	425.7	412.901	504.006	419.024	362.174	627.886
hsa-miR-16-2-3p	1856.29	2361.37	3468.2	3425.13	2560.46	3530.02	2088.26	1607.56	1398.59	1480.05	2955.5	1224.07	2517.96	1526.64	1300.58	1255.51	992.702	1230.84	1344.96	890.652	1983.47
hsa-miR-17-5p	281.256	632.405	653.503	605.603	634.073	1278	499.77	825.1	843.479	1139.92	698.302	689.938	946.155	860.402	420.56	692.068	721.491	756.009	602.986	681.848	672.043
hsa-miR-17-3p	0	0	0	9.92792	0	6.2039	0	14.6566	0	28.7747	0.877264	4.59058	0	11.4213	3.94628	5.78578	10.4312	0	4.08804	1.84783	4.2343
hsa-miR-181a-5p	717.203	1375.05	1708.37	1722.49	2863.11	2432.96	1990.67	2093.89	1568.01	1476.36	2293.17	1532.71	1514.23	1493.01	1761.17	848.284	1835.02	1183.09	985.217	1088.37	670.229
hsa-miR-181a-3p	105.471	5.80188	10.2914	4.96396	29.92	0	30.2891	38.307	34.2438	46.4822	27.1952	22.6829	22.0706	19.67	10.1476	17.5799	50.4174	0	34.7483	9.23913	0
hsa-miR-181a-2-3p	70.3141	75.4245	61.7483	49.6396	44.88	90.9905	111.06	156.892	138.778	136.495	169.312	169.311	123.787	161.167	183.22	93.0175	180.807	74.2746	134.905	230.978	116.746
hsa-miR-181b-5p	126.565	307.5	216.119	238.27	209.44	401.186	249.044	282.806	369.473	148.3	247.389	232.77	320.503	253.806	310.065	164.227	270.342	132.633	141.037	210.652	111.906
hsa-miR-181c-5p	0	0	0	0	0	1.03398	0	1.66552	0	11.805	0	1.89024	0	11.4213	0	0.22253	8.69266	0	6.13206	0	1.8147
hsa-miR-181c-3p	42.1884	0	0	0	0	1.03398	0	0.666209	0	7.37813	0	5.67072	0.959589	9.51772	3.38252	6.6759	17.3853	0	8.17608	20.3261	3.6294
hsa-miR-181d-5p	0	58.0188	56.6026	39.7117	29.92	67.2089	47.1163	80.6113	5.40692	56.8116	24.5634	76.1497	21.111	85.025	43.9728	71.8772	109.527	98.1486	51.1005	73.9131	68.3537
hsa-miR-182-5p	2193.8	1734.76	2089.15	1201.28	3675.55	3602.4	957.471	266.817	382.089	1015.97	1768.56	283.536	1251.3	418.78	443.674	276.382	201.67	397.9	441.508	301.196	428.269
hsa-miR-1827	0	0	0	14.8919	16.1108	15.5098	11.7791	6.32899	14.4184	10.3294	11.4044	5.40069	7.67671	11.4213	13.5301	9.56879	8.69266	23.874	6.13206	20.3261	6.049
hsa-miR-183-5p	2573.49	2541.22	1914.2	982.864	3219.85	2889.98	721.89	108.925	293.776	551.146	980.782	196.855	962.468	185.913	307.81	114.158	55.633	278.53	388.364	171.848	439.762
hsa-miR-184	133.597	104.434	257.285	9.92792	13.8092	19.6457	0	1.99863	27.0346	7.37813	8.77264	2.97038	7.67671	10.7867	9.02006	1.78024	0	18.5686	10.2201	18.4783	6.049
hsa-miR-185-5p	618.764	986.32	1260.69	1861.48	2392.45	2471.22	1125.74	1383.72	1991.55	1653.44	2214.22	1642.08	2504.53	2100.88	2926.45	1464.92	978.793	1814.42	1154.87	1302.72	1705.21
hsa-miR-185-3p	0	23.2075	0	0	46.0307	111.67	48.7991	166.885	59.4761	121.001	113.167	145.278	52.7774	118.02	83.9993	87.2318	98.227	106.107	57.2325	92.3913	71.3782
hsa-miR-186-5p	597.67	876.084	1214.38	883.585	1721.55	1638.86	1055.07	1012.3	1151.67	1239.53	1988.76	1008.58	1691.76	946.696	686.652	856.518	751.915	846.2	1095.59	796.413	1188.63
hsa-miR-18a-5p	0	0	10.2914	9.92792	24.1661	27.9176	10.0964	28.9801	36.0461	58.2872	30.7043	25.6533	61.4137	40.6089	19.7314	33.157	29.555	116.717	16.3522	53.587	41.1332
hsa-miR-18a-3p	0	69.6226	25.7285	14.8919	44.88	85.8206	42.0682	29.6463	45.0576	67.1409	80.7083	37.5348	47.9795	80.5834	38.3353	19.5826	39.117	108.759	47.0124	20.3261	42.9479
hsa-miR-1908-5p	253.131	0	56.6026	134.027	141.544	122.01	190.148	1168.86	264.939	847.009	278.97	671.575	145.858	531.089	563.754	599.051	1195.24	244.045	1085.37	1180.76	897.066
hsa-miR-1908-3p	0	0	0	0	0	1.03398	5.04818	26.9815	0	1.47563	0	6.21079	0	3.80709	10.1476	12.9067	33.0321	0	6.13206	25.8696	25.4058
hsa-miR-190a-5p	0	0	0	0	8.05538	11.3738	0	2.33173	0	11.805	8.77264	1.35017	0	0	0	0.66759	0	0	0	1.84783	7.2588
hsa-miR-190b	0	0	0	0	0	0	0	9.99314	0	3.68906	0	2.70034	0	8.88321	0	7.34349	3.47706	0	14.3081	0	2.4196
hsa-miR-191-5p	1989.89	4049.71	3648.3	2243.71	4891.91	5364.31	3274.59	8569.11	7468.75	13816.3	7208.48	9473.07	6239.25	11463.8	8903.36	7593.61	6702.91	6973.85	7080.48	8413.15	5351.55
hsa-miR-191-3p	0	0	0	4.96396	3.4523	26.8836	0	62.6236	41.453	42.0553	65.7948	56.7072	16.313	50.1267	19.1676	53.4072	66.9335	10.6107	69.4967	77.6087	82.8712
hsa-miR-1910-5p	0	0	0	14.8919	0	0	0	0	0	0	0	0	0	0	7.89255	0	0	0	0	0	0
hsa-miR-1914-5p	0	0	0	0	4.60307	0	0	10.3262	14.4184	0.737813	0	4.59058	0	8.24869	12.9663	6.00831	8.69266	34.4846	0	24.0217	17.5421
hsa-miR-192-5p	5561.84	3457.92	3694.61	1355.16	4889.61	3843.32	1583.45	579.935	2357.42	1594.41	4407.38	1711.21	4761.48	1225.25	1822.05	1244.61	443.326	1286.54	1943.86	977.5	1891.52
hsa-miR-193a-5p	119.534	63.8207	210.973	253.162	325.667	270.904	79.0881	99.9314	436.158	55.3359	307.043	85.8709	444.29	135.786	164.052	77.4404	32.1628	111.412	110.377	22.1739	160.298
hsa-miR-193b-5p	77.3455	5.80188	20.5828	19.8558	159.957	90.9905	47.1163	19.6532	136.975	8.11594	73.6902	17.2822	138.181	21.5735	79.4893	20.9178	14.7775	76.9273	57.2325	3.69565	56.2557
hsa-miR-194-5p	260.162	377.122	365.344	273.018	695.064	541.807	240.63	97.5996	400.112	218.393	686.898	169.311	1060.35	220.811	279.622	135.076	66.0642	270.572	206.446	110.87	449.44
hsa-miR-194-3p	49.2198	0	0	0	0	0	0	1.33242	0	3.68906	6.14085	1.35017	0	5.71063	0	0	0	0	0	0	0
hsa-miR-195-5p	0	110.236	30.8742	19.8558	2.30154	3.10195	18.51	0.666209	0	7.37813	18.4226	10.5313	0.959589	3.80709	14.6576	6.45337	5.2156	0	4.08804	22.1739	0.6049
hsa-miR-195-3p	0	110.236	66.894	0	63.2922	38.2574	52.1645	10.3262	36.0461	10.3294	23.6861	8.37106	26.8685	11.4213	26.4964	7.78855	0	0	2.04402	5.54348	17.5421
hsa-miR-196a-5p	0	0	0	0	0	2.06797	0	4.33036	0	7.37813	0	1.62021	2.87877	0.634515	4.51003	2.2253	0	31.832	12.2641	0	1.2098
hsa-miR-196b-5p	0	34.8113	10.2914	0	43.7292	62.039	30.2891	39.3063	32.4415	36.1528	84.2174	44.8257	26.8685	36.8019	20.8589	39.3878	26.078	47.748	38.8364	31.413	35.0842
hsa-miR-197-5p	0	0	36.0199	0	1.15077	0	1.68273	3.66415	18.0231	0.737813	0	7.83099	0	0	0	3.33795	1.73853	10.6107	0	1.84783	9.07349
hsa-miR-197-3p	7.03141	11.6038	61.7483	74.4594	78.2522	49.6312	0	270.148	174.824	163.057	140.362	471.48	93.0802	163.07	171.381	235.214	192.977	259.961	335.219	273.478	390.765
hsa-miR-1976	0	0	0	0	16.1108	0	0	0	0	2.95125	19.2998	1.08014	0.959589	0	0.563754	1.78024	4.34633	0	0	0	3.6294
hsa-miR-199a-5p	914.083	487.358	694.669	342.513	1017.28	904.735	657.946	4296.05	3202.7	4107.4	2277.38	4145.03	1826.1	3656.71	1375	5463.56	4897.44	3161.98	4310.84	4414.46	2706.32
hsa-miR-199a-3p	330.476	481.556	509.424	327.621	374	331.909	482.943	1147.21	857.897	1207.8	620.226	1225.69	1111.2	1089.46	907.08	1640.27	672.812	790.494	956.601	851.848	1212.82
hsa-miR-199b-3p	330.476	481.556	509.424	327.621	374	331.909	482.943	1147.21	857.897	1207.8	620.226	1225.69	1111.2	1089.46	907.08	1640.27	672.812	790.494	956.601	851.848	1212.82
hsa-miR-199b-5p	0	23.2075	56.6026	0	0	34.1215	0	17.3214	59.4761	34.6772	18.4226	22.1428	23.0301	34.2638	23.6777	21.8079	20.8624	2.65266	20.4402	35.1087	25.4058
hsa-miR-19a-3p	84.3769	58.0188	5.14569	39.7117	65.5938	88.9226	111.06	156.226	167.614	140.922	118.431	108.014	95.9589	105.329	69.9055	123.727	55.633	79.5799	77.6727	112.717	173.001
hsa-miR-19b-3p	28.1256	29.0094	41.1656	44.6756	44.88	122.01	50.4818	168.218	90.1153	123.953	192.998	81.2803	172.726	109.771	57.5029	102.141	97.3578	26.5266	89.9369	105.326	130.053
hsa-miR-200a-5p	7.03141	11.6038	0	0	0	0	0	0	0	1.47563	0	1.62021	0	0	0.563754	0	0	0	10.2201	5.54348	0
hsa-miR-200a-3p	35.157	174.056	56.6026	49.6396	0	1.03398	0	12.658	16.2207	6.64031	53.5131	14.3118	247.574	53.9337	51.3016	20.0277	8.69266	37.1373	2.04402	9.23913	45.3675
hsa-miR-200b-5p	7.03141	0	0	0	0	12.4078	0	1.33242	0	0	0	2.70034	3.83836	10.1522	1.12751	3.33795	0	23.874	12.2641	0	1.8147
hsa-miR-200b-3p	77.3455	150.849	118.351	104.243	33.3723	42.3933	74.04	33.3105	48.6622	49.4334	45.6177	65.6183	132.423	90.7356	84.5631	44.7285	17.3853	37.1373	30.6603	48.0435	12.7029
hsa-miR-200c-3p	182.817	301.698	159.517	193.594	64.443	51.6992	28.6064	60.9581	75.6968	136.495	51.7586	226.019	190.958	162.436	171.945	109.93	83.4495	82.2326	69.4967	73.9131	42.343
hsa-miR-202-3p	0	0	0	4.96396	10.3569	0	0	2.33173	0	0	0	0.810103	0	0	2.81877	0	0	0	4.08804	0	0
hsa-miR-203a-3p	7.03141	0	20.5828	4.96396	27.6184	15.5098	45.4336	7.3283	28.8369	12.5428	18.4226	8.6411	8.6363	9.51772	12.4026	9.12373	1.73853	10.6107	14.3081	1.84783	4.8392
hsa-miR-204-5p	14.0628	121.84	87.4768	64.5315	146.148	97.1944	117.791	47.967	45.0576	98.1291	184.226	33.7543	102.676	94.5427	51.8653	22.6981	35.6399	53.0533	8.17608	22.1739	26.6156
hsa-miR-204-3p	0	87.0282	15.4371	69.4954	9.20614	87.8886	0	4.66346	48.6622	5.9025	9.64991	11.6115	185.201	5.71063	23.1139	3.11542	5.2156	0	4.08804	7.39131	8.46859
hsa-miR-205-5p	0	0	0	0	0	0	0	0.999314	10.8138	5.16469	0	3.24041	0	19.67	82.308	2.44783	0	0	0	0	0
hsa-miR-206	84.3769	0	0	188.63	65.5938	5.16992	0	3.66415	136.975	6.64031	34.2133	3.78048	118.989	1.26903	19.7314	34.0471	4.34633	183.034	8.17608	7.39131	20.5666
hsa-miR-20a-5p	667.984	800.66	632.92	943.152	1078.27	1616.12	723.572	834.094	935.396	996.785	893.932	772.028	1058.43	992.381	416.05	781.303	827.541	936.39	823.74	770.544	789.394
hsa-miR-20a-3p	0	0	0	0	0	0	0	5.66278	0	2.21344	6.14085	0.270034	0	13.9593	0	0.66759	0	0	0	0	0
hsa-miR-20b-5p	0	121.84	164.662	129.063	139.243	205.763	74.04	29.3132	66.6853	69.3544	159.662	54.817	182.322	84.3905	37.7715	49.4017	71.2798	53.0533	63.3646	29.5652	39.9234
hsa-miR-21-5p	16973.8	19250.6	17377	10146.3	16639	14827.3	13650.3	40979.5	30900.5	53303.3	25532.8	48565.9	36654.4	45763.7	55277.7	62353.4	36272.7	41678.7	41397.5	43483	30831.1
hsa-miR-21-3p	0	0	0	0	0	16.5437	0	50.2988	0	11.805	8.77264	15.932	14.3938	15.2284	17.4764	19.1376	3.47706	0	20.4402	14.7826	6.049
hsa-miR-210-3p	0	11.6038	5.14569	9.92792	21.8646	18.6117	0	32.3111	77.4991	46.4822	18.4226	20.5226	54.6966	5.07612	52.9928	47.844	55.633	137.939	30.6603	35.1087	26.0107
hsa-miR-2110	196.879	295.896	349.907	327.621	416.578	566.623	316.353	276.477	207.265	336.443	531.622	333.762	540.249	314.719	404.775	268.816	372.915	331.583	376.1	478.587	399.234
hsa-miR-2115-3p	0	0	0	0	13.8092	0	0	1.99863	0	2.95125	0	0	9.59589	11.4213	0	0	0	0	0	0	0
hsa-miR-212-5p	0	0	0	0	0	0	0	0	0	1.47563	15.7908	1.08014	1.91918	5.07612	1.12751	2.89289	0	0	0	0	5.4441
hsa-miR-214-5p	0	0	5.14569	0	8.05538	0	15.1445	0.333105	0	0	0	0.540069	14.3938	5.71063	0	0	0	0	16.3522	0	0
hsa-miR-214-3p	0	0	0	9.92792	16.1108	19.6457	0	4.99657	5.40692	8.85375	0	1.62021	8.6363	17.1319	8.45631	3.11542	0	0	2.04402	5.54348	0
hsa-miR-215-5p	379.696	121.84	185.245	59.5675	192.178	70.3109	99.2809	16.3221	158.603	30.2503	185.98	49.4163	925.044	38.7054	55.8116	41.8356	3.47706	108.759	32.7043	18.4783	306.684
hsa-miR-216b-5p	0	0	0	0	0	0	0	0.999314	54.0692	5.16469	5.26359	0	0	3.80709	0	0.44506	0	0	10.2201	0	0
hsa-miR-218-5p	98.4397	40.6132	0	0	33.3723	9.30585	33.6545	3.33105	9.01153	2.21344	1.75453	0.810103	1.91918	2.53806	3.94628	0	0	0	16.3522	1.84783	0
hsa-miR-219a-1-3p	0	17.4056	0	0	0	0	26.9236	7.99451	0	5.16469	12.2817	1.89024	0	5.71063	4.51003	0.66759	0	0	0	3.69565	0
hsa-miR-22-5p	63.2827	87.0282	25.7285	14.8919	162.258	153.03	31.9718	261.487	102.731	154.941	168.435	214.677	191.918	154.822	209.153	239.887	213.839	76.9273	136.949	218.044	266.156
hsa-miR-22-3p	2207.86	4676.32	4265.78	4323.61	5719.32	4251.74	2386.11	6766.35	4206.58	4896.12	5635.55	5091.23	7813.94	4242.37	4638.57	5792.46	2485.23	3026.69	3756.91	3460.98	5445.91
hsa-miR-221-5p	84.3769	0	25.7285	29.7838	10.3569	13.4418	0	157.558	113.545	205.112	78.9538	191.994	121.868	192.258	131.918	151.32	228.617	132.633	167.61	136.739	127.634
hsa-miR-221-3p	358.602	295.896	272.722	287.91	850.418	1011.24	614.195	2542.92	1560.8	2403.79	1419.41	3770.49	1307.92	2121.82	1899.85	2309.64	1807.2	1692.4	1943.86	1724.02	2100.21
hsa-miR-222-5p	0	0	0	0	0	0	0	0.666209	0	0	0	2.16027	0.959589	0	0	0	2.6078	0	6.13206	0	6.049
hsa-miR-222-3p	2594.59	2663.06	2526.54	838.909	2260.11	2716.27	2771.45	10290.3	5718.71	10900.4	5740.82	10162.2	3799.97	6595.15	8272.52	6979.65	14527.2	9621.21	11495.6	11890.8	8302.25
hsa-miR-223-5p	442.979	794.858	946.808	312.729	950.534	664.851	545.203	1491.98	1256.21	1513.25	755.325	1838.12	854.994	1236.67	1546.38	1943.58	2163.6	1244.1	1913.2	1796.09	2047.59
hsa-miR-223-3p	0	5.80188	72.0397	39.7117	316.461	118.908	176.686	533.3	333.426	539.341	368.451	553.3	388.634	578.677	284.132	477.772	306.851	289.14	406.76	352.935	352.656
hsa-miR-224-5p	267.193	214.67	360.199	129.063	172.615	100.296	220.437	729.166	1331.9	1622.45	591.276	796.871	263.887	1134.51	1822.62	1624.69	1569.89	859.463	1344.96	1422.83	910.374
hsa-miR-2276-3p	0	0	0	0	0	0	0	0	18.0231	0	0	1.35017	0	0	6.20129	6.00831	0.869266	18.5686	10.2201	0	4.8392
hsa-miR-2277-5p	0	0	0	0	0	3.10195	0	2.33173	0	8.11594	0	3.24041	1.91918	0	0	2.89289	1.73853	0	16.3522	0	0
hsa-miR-2355-5p	0	0	0	0	0	0	0	0	0	1.47563	0	0.540069	0	5.07612	0	0	6.08486	0	0	0	0
hsa-miR-2355-3p	0	0	0	0	42.5784	2.06797	0	48.9664	39.6507	22.8722	6.14085	41.0452	9.59589	17.7664	24.2414	36.94	47.8096	23.874	12.2641	27.7174	54.441
hsa-miR-23a-5p	0	0	0	59.5675	1.15077	17.5777	33.6545	52.9636	0	24.3478	26.3179	48.0661	32.626	12.0558	40.0265	37.385	54.7637	5.30533	49.0565	62.8261	62.9096
hsa-miR-23a-3p	91.4083	75.4245	5.14569	134.027	192.178	130.282	198.562	283.139	252.323	254.545	255.284	406.402	327.22	324.237	175.891	299.97	250.349	108.759	255.502	375.109	218.369
hsa-miR-23b-5p	0	0	0	0	12.6584	17.5777	0	21.6518	5.40692	17.7075	16.668	33.4842	0	29.1877	20.8589	22.4755	0	23.874	18.3962	9.23913	3.0245
hsa-miR-23b-3p	84.3769	388.726	41.1656	59.5675	112.775	146.826	40.3854	219.183	108.138	350.461	120.185	286.506	296.513	336.293	205.77	228.983	265.995	111.412	335.219	295.652	174.816
hsa-miR-24-1-5p	14.0628	29.0094	0	19.8558	16.1108	11.3738	0	3.99725	3.60461	18.4453	0.877264	8.37106	23.0301	19.67	15.2214	1.55771	2.6078	0	10.2201	3.69565	13.9127
hsa-miR-24-3p	2137.55	3069.2	3776.94	3077.65	3909.16	2698.7	3325.07	12817.5	6014.29	7419.44	6697.91	9068.83	4350.78	7634.48	7012.53	10597.8	8395.37	6302.73	9222.62	9154.13	11322.5
hsa-miR-24-2-5p	0	23.2075	36.0199	54.6036	36.8246	56.8691	139.666	103.929	36.0461	84.8484	42.1087	85.8709	62.3733	82.4869	130.791	85.6741	98.227	106.107	100.157	127.5	76.2174
hsa-miR-25-5p	0	23.2075	128.642	79.4234	75.9507	47.5632	67.3091	29.6463	54.0692	31.7259	80.7083	48.6062	55.6562	25.3806	36.0802	29.374	40.8555	37.1373	24.5282	27.7174	39.9234
hsa-miR-25-3p	11278.4	12729.3	16502.2	16058.4	12191.2	14407.5	7969.39	6872.28	6149.47	6573.17	15559.2	7930.64	10846.2	7208.09	5934.64	6219.05	5390.32	6236.41	5690.55	4529.02	9782.44
hsa-miR-26a-5p	31845.2	39708.1	40635.5	22849.1	49838.6	59953.5	47104.6	75612.1	67660.3	122885	63437.6	88148.4	55174.5	101373	78074.8	88534	98643.4	105717	98628	100875	64759.9
hsa-miR-26a-2-3p	0	29.0094	0	0	0	16.5437	0	8.99382	10.8138	0	0	4.59058	6.71713	1.26903	2.25501	0.89012	0	0	10.2201	5.54348	0
hsa-miR-26b-5p	1842.23	2222.12	3370.43	2546.51	4100.19	5938.17	2796.69	3321.05	3781.24	5432.51	2958.14	2945.53	4034.11	4661.78	2333.94	3112.08	2581.72	3506.82	2655.18	2640.54	2069.36
hsa-miR-26b-3p	0	0	0	9.92792	31.0707	21.7137	0	56.9609	36.0461	30.9881	63.163	55.8971	30.7069	52.0302	25.9327	51.1819	40.8555	34.4846	63.3646	24.0217	69.5635
hsa-miR-27a-5p	0	156.651	164.662	49.6396	135.791	139.588	107.694	14.3235	104.534	45.0066	78.9538	31.864	61.4137	52.0302	65.3954	15.132	44.3326	66.3166	16.3522	18.4783	37.5038
hsa-miR-27a-3p	2418.8	3214.24	2089.15	3047.87	4740.01	3925	3698.63	3448.96	4399.43	2679.74	4502.12	2513.75	3943.91	3901.63	3703.3	2512.36	2435.68	3448.46	2528.45	2041.85	3268.88
hsa-miR-27b-5p	0	0	30.8742	14.8919	14.96	6.2039	21.8754	10.3262	45.0576	45.0066	27.1952	15.392	6.71713	27.9186	27.6239	26.9261	32.1628	71.6219	16.3522	31.413	15.1225
hsa-miR-27b-3p	2250.05	2680.47	1806.14	2258.6	3050.69	2389.54	1871.19	2372.37	2898.11	1923.48	2598.46	2108.43	2826.95	2328.03	2640.06	2197.04	1976.71	2100.91	2099.21	1681.52	1898.78
hsa-miR-28-5p	133.597	46.4151	164.662	54.6036	111.624	84.7866	20.1927	257.157	252.323	402.846	285.988	304.599	192.877	359.135	203.515	273.267	174.722	196.297	200.314	251.304	189.938
hsa-miR-28-3p	590.638	609.198	787.291	451.72	718.079	693.803	624.292	1727.15	1465.27	1680.74	1513.28	2186.47	993.175	1831.84	1091.43	1716.82	1448.2	1180.44	1494.18	1415.43	1588.47
hsa-miR-296-3p	0	0	0	9.92792	0	11.3738	0	2.99794	0	3.68906	0	10.2613	0	4.4416	4.51003	10.0139	8.69266	0	2.04402	12.9348	9.07349
hsa-miR-29a-3p	344.539	539.575	252.139	377.261	636.375	459.089	378.613	280.474	374.879	253.07	607.067	410.452	384.795	484.769	224.938	170.235	156.468	249.35	286.163	197.717	280.069
hsa-miR-29b-3p	0	23.2075	118.351	34.7477	59.8399	9.30585	30.2891	4.66346	0	22.1344	34.2133	11.6115	17.2726	21.5735	15.2214	12.9067	4.34633	2.65266	24.5282	1.84783	5.4441
hsa-miR-29b-2-5p	0	0	0	0	1.15077	0	0	7.99451	0	2.95125	0	5.13065	13.4343	4.4416	0	1.33518	1.73853	0	0	0	3.6294
hsa-miR-29c-5p	0	0	0	0	26.4677	16.5437	0	4.33036	0	0.737813	0	8.91113	0	11.4213	3.94628	8.23361	3.47706	5.30533	16.3522	0	10.2833
hsa-miR-29c-3p	0	0	10.2914	4.96396	36.8246	7.23788	0	11.9918	21.6277	11.0672	16.668	8.37106	27.8281	6.97966	9.02006	4.00554	0	7.95799	0	3.69565	5.4441
hsa-miR-301a-5p	63.2827	0	41.1656	0	10.3569	17.5777	0	4.99657	0	10.3294	16.668	10.8014	11.5151	17.7664	6.20129	3.78301	9.56192	29.1793	2.04402	7.39131	24.196
hsa-miR-301a-3p	0	0	0	0	0	8.27187	0	0	5.40692	3.68906	0	0.540069	0	0	0	0	0	0	0	0	0
hsa-miR-3064-5p	0	0	0	0	0	12.4078	0	15.3228	9.01153	13.2806	14.9135	8.37106	14.3938	1.90354	10.7113	13.5743	10.4312	0	0	5.54348	6.049
hsa-miR-3074-5p	0	0	0	0	0	9.30585	0	52.6305	0	13.2806	7.01811	17.5522	4.79795	0	10.7113	10.6814	20.8624	0	12.2641	7.39131	12.098
hsa-miR-30a-5p	1364.09	1131.37	879.914	1111.93	1733.06	1325.57	1036.56	326.776	1367.95	661.818	1059.74	359.956	1258.02	768.397	588.559	343.364	229.486	936.39	468.08	397.283	379.272
hsa-miR-30a-3p	365.633	237.877	267.576	342.513	472.966	442.545	277.65	85.2748	261.334	221.344	270.197	117.735	206.312	229.06	204.643	134.408	132.128	209.56	198.27	151.522	153.04
hsa-miR-30b-5p	0	52.2169	72.0397	4.96396	23.0154	142.69	1.68273	48.9664	41.453	81.1594	35.0906	43.4755	58.5349	119.289	50.1741	43.8384	25.2087	50.4006	73.5847	40.6522	19.9617
hsa-miR-30b-3p	42.1884	0	0	0	19.5631	17.5777	45.4336	15.989	0	14.0184	10.5272	21.0627	7.67671	27.2841	42.2815	24.0332	12.1697	21.2213	30.6603	25.8696	7.2588
hsa-miR-30c-5p	1532.85	1699.95	1605.46	1186.39	1628.34	2849.66	1502.67	1896.7	2126.72	3067.09	2137.89	1787.9	2058.32	2652.91	1619.66	1743.97	1761.13	2222.93	1976.57	1875.54	1325.34
hsa-miR-30c-1-3p	0	0	0	0	13.8092	26.8836	0	19.3201	0	25.0856	0	29.9738	0	6.97966	16.9126	30.9317	22.6009	13.2633	10.2201	11.087	9.67839
hsa-miR-30c-2-3p	0	5.80188	0	14.8919	12.6584	0	0	1.33242	10.8138	14.0184	25.4407	6.21079	0	15.8629	19.7314	1.55771	13.9083	53.0533	0	0	1.2098
hsa-miR-30d-5p	14337	14841.2	18859	8612.47	13243	11767.8	10098	18525.3	11352.7	18759.6	14206.4	21921.7	10796.3	17028.5	21178	20580	24233.4	19149.6	22337	23022.1	22815.6
hsa-miR-30d-3p	7.03141	0	0	29.7838	4.60307	17.5777	0	6.32899	23.43	8.11594	0	14.5819	29.7473	24.7461	33.2615	32.2669	19.9931	29.1793	24.5282	20.3261	22.3813
hsa-miR-30e-5p	2067.23	1717.36	1898.76	1201.28	2718.11	2994.42	1822.39	5137.14	2977.41	4375.97	3229.21	2834.55	2820.23	3314.07	2216.68	3305.68	3284.09	2604.92	3145.75	2999.02	2356.08
hsa-miR-30e-3p	1082.84	992.122	1219.53	536.108	907.956	729.992	452.653	863.074	917.373	1082.37	880.773	1122.26	827.166	1328.04	1222.22	1053.9	1116.14	1029.23	954.557	1153.04	976.913
hsa-miR-31-5p	0	0	82.3311	39.7117	0	0	0	1.33242	0	0	0	0	0	1.90354	0	0	0	10.6107	0	0	0
hsa-miR-3120-5p	0	0	0	0	14.96	13.4418	0	8.99382	0	3.68906	17.5453	17.2822	0	10.1522	31.0065	14.9095	32.1628	0	36.7924	12.9348	17.5421
hsa-miR-3120-3p	0	0	0	0	0	19.6457	0	82.6099	12.6161	42.0553	4.38632	55.087	27.8281	44.416	33.2615	56.5226	67.8027	29.1793	42.9244	73.9131	89.5251
hsa-miR-3121-3p	0	0	0	0	0	0	0	0	0	0	0	1.35017	0	0	0	3.11542	0	0	12.2641	0	0
hsa-miR-3124-5p	0	0	0	14.8919	0	21.7137	0	2.33173	0	4.42688	7.89538	10.2613	0.959589	7.61418	2.81877	8.9012	0	0	8.17608	9.23913	6.6539
hsa-miR-3127-5p	0	0	5.14569	0	0	0	0	0	0	5.9025	0	1.62021	0	0	2.81877	1.33518	0	0	0	0	6.6539
hsa-miR-3127-3p	0	0	10.2914	0	0	0	0	9.66003	0	2.21344	16.668	1.08014	0	0	14.6576	6.23084	2.6078	0	26.5723	5.54348	0
hsa-miR-3130-3p	49.2198	17.4056	0	0	0	0	0	4.66346	0	0	0	0.540069	0	0	0	0	4.34633	0	0	0	0
hsa-miR-3135a	0	0	0	0	14.96	1.03398	0	0	14.4184	0	9.64991	6.75086	0	3.17257	0	0.22253	0	0	2.04402	0	0
hsa-miR-3138	0	0	5.14569	14.8919	6.90461	39.2914	25.2409	106.593	25.2323	44.2688	66.6721	112.334	14.3938	29.8222	50.7378	164.227	167.768	84.8853	126.729	142.283	297.611
hsa-miR-3143	0	0	0	0	0	11.3738	0	3.66415	0	11.0672	17.5453	5.13065	3.83836	2.53806	0	2.2253	12.1697	5.30533	0	0	8.46859
hsa-miR-3150a-5p	0	0	0	0	0	0	0	7.6614	0	5.16469	0	6.75086	0	8.88321	16.9126	8.9012	6.08486	0	2.04402	3.69565	0
hsa-miR-3150a-3p	0	0	0	0	21.8646	0	0	0	0	0	0	0	0	0	0	0	7.82339	0	0	0	0
hsa-miR-3151-5p	0	0	0	0	4.60307	0	26.9236	2.66484	0	1.47563	12.2817	0.270034	0	0	3.94628	0.66759	2.6078	0	0	0	7.8637
hsa-miR-3158-3p	84.3769	63.8207	77.1854	59.5675	62.1415	75.4808	38.7027	25.3159	0	9.59156	37.7224	17.5522	41.2623	6.34515	50.7378	8.01108	7.82339	29.1793	18.3962	7.39131	30.245
hsa-miR-3161	0	0	0	0	0	0	0	11.3256	0	7.37813	0	37.2647	0	0	5.63754	0	6.95413	0	24.5282	22.1739	0
hsa-miR-3163	0	0	5.14569	0	11.5077	0	0	2.33173	0	0	9.64991	0	0	0	3.38252	0.66759	0	0	0	0	0
hsa-miR-3173-5p	70.3141	0	10.2914	39.7117	0	28.9515	0	19.3201	30.6392	20.6588	4.38632	20.2526	24.9493	15.8629	4.51003	15.3546	39.9862	2.65266	10.2201	27.7174	54.441
hsa-miR-3174	0	0	0	0	0	0	0	0	0	4.42688	0	6.48082	9.59589	13.3248	1.12751	0.89012	7.82339	7.95799	0	0	4.2343
hsa-miR-3176	0	0	0	9.92792	0	7.23788	0	3.66415	0	0	0	1.08014	8.6363	0	0	0	0	0	0	0	0.6049
hsa-miR-3177-3p	0	0	25.7285	0	0	1.03398	0	36.9746	10.8138	24.3478	14.0362	49.6863	31.6664	28.5532	23.6777	46.7313	57.3715	21.2213	20.4402	72.0652	60.49
hsa-miR-3179	0	0	0	14.8919	0	0	0	0	0	7.37813	0	2.43031	0	3.80709	2.81877	4.00554	0	0	0	0	0
hsa-miR-3180-3p	0	0	20.5828	19.8558	21.8646	0	0	10.9924	0	0.737813	15.7908	6.48082	3.83836	0.634515	7.3288	9.34626	0	0	0	5.54348	5.4441
hsa-miR-3180	0	0	20.5828	19.8558	21.8646	0	0	10.9924	0	0.737813	15.7908	6.48082	3.83836	0.634515	7.3288	9.34626	0	0	0	5.54348	5.4441
hsa-miR-3187-3p	0	0	0	0	27.6184	0	0	10.3262	0	2.21344	21.9316	14.5819	4.79795	6.97966	6.76504	14.4645	2.6078	2.65266	20.4402	1.84783	7.2588
hsa-miR-3188	0	0	0	0	0	0	0	4.99657	0	1.47563	0	17.5522	0	3.80709	3.94628	5.34072	0	0	10.2201	18.4783	10.2833
hsa-miR-3190-3p	0	0	0	14.8919	10.3569	0	0	1.33242	0	7.37813	0	7.56096	0	5.07612	0	7.34349	6.08486	37.1373	12.2641	1.84783	10.2833
hsa-miR-3191-3p	0	0	0	0	0	0	1.68273	13.3242	0	2.21344	7.01811	12.1515	14.3938	6.97966	1.69126	10.2364	26.9472	21.2213	16.3522	20.3261	31.4548
hsa-miR-3192-5p	0	0	0	0	0	0	0	0	0	0	0	0	0	0	0	0	6.08486	0	0	0	0
hsa-miR-3198	0	0	0	0	0	0	0	5.66278	0	0.737813	0	2.43031	0	2.53806	12.9663	5.56325	4.34633	13.2633	2.04402	14.7826	7.8637
hsa-miR-32-5p	105.471	232.075	164.662	134.027	82.8553	141.656	265.871	109.591	50.4645	94.44	116.676	64.5382	102.676	107.233	72.1605	101.251	74.7569	53.0533	65.4086	90.5435	97.3888
hsa-miR-32-3p	0	0	0	0	9.20614	0	0	3.66415	0	2.21344	26.3179	2.70034	0	8.24869	11.8388	8.45614	12.1697	0	0	3.69565	8.46859
hsa-miR-3202	0	0	0	0	0	0	0	4.33036	0	0	0	1.08014	0	0	0	2.00277	0	0	0	1.84783	0
hsa-miR-320a	2896.94	5186.88	5356.67	6338.98	13014	12525.7	10613	6221.39	6497.31	5417.02	5664.5	11407.3	13923.6	10548.2	21201.6	8781.03	7975.51	9095.99	7507.68	8505.54	12436.1
hsa-miR-320b	675.015	910.896	972.536	1106.96	1875.75	1651.27	1043.29	603.585	928.187	558.524	713.216	998.047	5413.04	1159.89	4002.65	860.524	644.995	726.83	523.269	528.478	1028.93
hsa-miR-320c	168.754	266.887	298.45	461.648	514.393	468.394	284.381	231.508	428.949	215.441	247.389	328.092	2323.17	472.713	2017.67	340.693	199.931	172.423	161.478	157.065	293.376
hsa-miR-320d	7.03141	52.2169	72.0397	104.243	134.64	116.84	55.53	51.2981	75.6968	53.1225	73.6902	103.423	612.218	189.085	979.804	111.71	27.8165	37.1373	53.1445	35.1087	59.8851
hsa-miR-320e	0	0	0	4.96396	1.15077	3.10195	0	0.666209	1.80231	0.737813	0	0.270034	0.959589	1.26903	11.2751	0.22253	0.869266	0	0	0	0.6049
hsa-miR-323a-5p	0	0	0	4.96396	0	0	0	12.9911	0	4.42688	0	2.16027	0	0	0	8.23361	16.5161	5.30533	12.2641	14.7826	9.07349
hsa-miR-323a-3p	7.03141	46.4151	0	0	0	11.3738	0	125.58	43.2553	45.0066	34.2133	49.9563	66.2117	17.1319	18.0401	102.364	89.5344	53.0533	69.4967	33.2609	45.3675
hsa-miR-323b-3p	0	29.0094	0	79.4234	62.1415	21.7137	0	79.612	1.80231	42.0553	34.2133	52.3866	39.3432	42.5125	44.5365	62.976	116.482	98.1486	67.4526	38.8044	44.7626
hsa-miR-324-5p	0	0	0	0	1.15077	0	0	4.66346	0	5.9025	0	1.62021	3.83836	0	1.69126	0	0	0	2.04402	0	0
hsa-miR-324-3p	77.3455	0	0	14.8919	24.1661	0	0	11.3256	0	8.11594	8.77264	8.10103	8.6363	0.634515	2.25501	5.11819	13.039	0	0	11.087	8.46859
hsa-miR-326	0	0	0	0	26.4677	1.03398	0	61.9574	3.60461	25.0856	2.63179	33.7543	2.87877	12.6903	31.0065	37.8301	41.7248	13.2633	30.6603	49.8913	63.5145
hsa-miR-328-5p	0	0	0	0	8.05538	14.4758	0	1.66552	0	2.95125	0	0	0	0	0	0	0	0	0	0	1.2098
hsa-miR-328-3p	506.261	400.33	1451.09	297.838	1027.64	701.041	1152.67	4216.77	1917.65	2371.33	1954.54	3354.64	1102.57	2121.18	2921.37	3097.4	5765.84	2464.32	3527.98	4830.22	6015.73
hsa-miR-329-3p	0	0	0	4.96396	13.8092	0	0	14.3235	0	10.3294	0	11.0714	15.3534	4.4416	0	15.3546	6.95413	0	0	3.69565	5.4441
hsa-miR-330-5p	0	0	0	4.96396	21.8646	12.4078	0	61.6243	0	37.6284	19.2998	27.5435	16.313	38.0709	32.6977	25.591	12.1697	39.79	22.4842	25.8696	33.8744
hsa-miR-330-3p	7.03141	382.924	221.265	59.5675	123.132	166.471	183.417	649.887	291.973	585.823	426.35	787.69	210.15	553.931	553.042	553.21	847.534	509.312	682.703	777.935	496.018
hsa-miR-331-5p	0	17.4056	0	0	6.90461	9.30585	20.1927	28.647	0	7.37813	9.64991	22.6829	28.7877	15.8629	29.8789	38.7202	36.5092	2.65266	8.17608	14.7826	34.4793
hsa-miR-331-3p	14.0628	0	0	0	11.5077	19.6457	0	33.3105	1.80231	33.9394	0	38.6149	3.83836	23.477	46.2278	31.8218	38.2477	47.748	12.2641	60.9783	21.7764
hsa-miR-335-5p	7.03141	52.2169	133.788	49.6396	64.443	46.5293	0	83.9423	46.8599	94.44	32.4588	74.2594	163.13	121.827	68.2142	127.287	65.1949	63.6639	44.9684	68.3696	131.263
hsa-miR-335-3p	91.4083	34.8113	118.351	59.5675	50.6338	120.976	74.04	127.246	102.731	219.13	195.63	224.669	80.6055	220.177	191.676	299.08	99.9656	42.4426	147.169	138.587	188.124
hsa-miR-337-3p	0	0	0	0	0	0	37.02	15.989	0	5.16469	0.877264	6.21079	2.87877	0	9.58381	13.1293	1.73853	18.5686	0	12.9348	7.2588
hsa-miR-338-5p	70.3141	87.0282	0	0	46.0307	66.1749	84.1363	46.6346	32.4415	44.2688	90.3582	88.3012	95.9589	81.2179	70.4692	81.2235	18.2546	0	63.3646	55.4348	65.3292
hsa-miR-338-3p	0	0	0	0	0	17.5777	37.02	0.333105	0	0	0	0.540069	4.79795	0	5.07378	0	4.34633	0	0	0	0
hsa-miR-339-5p	63.2827	5.80188	25.7285	24.8198	82.8553	19.6457	74.04	448.692	335.229	452.279	193.875	317.02	226.463	355.963	190.549	310.207	352.053	145.897	372.012	389.891	230.467
hsa-miR-339-3p	161.722	0	41.1656	148.919	58.6892	26.8836	80.7709	153.894	135.173	143.873	113.167	167.961	110.353	93.2737	151.65	179.804	147.775	129.981	179.874	197.717	189.938
hsa-miR-33a-5p	0	0	0	0	6.90461	0	0	15.3228	0	2.95125	0	2.43031	0	0.634515	3.38252	6.89843	1.73853	5.30533	6.13206	5.54348	3.6294
hsa-miR-340-5p	492.198	411.934	658.649	565.891	439.593	541.807	183.417	853.081	1256.21	1071.3	430.737	712.62	680.349	1203.04	551.915	942.86	1000.53	1278.58	766.507	951.631	907.954
hsa-miR-340-3p	0	87.0282	138.934	0	138.092	127.18	53.8472	266.15	219.881	300.29	110.535	234.12	104.595	222.08	334.306	212.071	444.195	501.354	237.106	369.565	148.805
hsa-miR-342-5p	808.612	910.896	941.662	511.288	1484.49	1229.41	728.621	213.52	428.949	314.308	594.785	345.914	391.512	244.923	707.511	211.181	377.261	525.227	527.357	380.652	412.542
hsa-miR-342-3p	112.503	197.264	128.642	34.7477	111.624	83.7527	136.301	50.965	93.7199	56.0738	52.6359	79.12	73.8884	41.2435	103.731	38.0526	55.633	50.4006	18.3962	64.6739	50.8116
hsa-miR-345-5p	0	0	0	39.7117	23.0154	19.6457	57.2127	110.924	63.0807	44.2688	86.8492	61.2978	61.4137	47.5886	56.9391	49.1791	60.8486	55.7059	10.2201	64.6739	70.7733
hsa-miR-34a-5p	0	0	0	0	11.5077	0	0	0	0	0	0	0	21.111	2.53806	0	2.2253	0	0	0	0	4.8392
hsa-miR-34c-5p	119.534	11.6038	0	0	25.3169	0	0	0	0	0	0	0.270034	0	0	0	0	0	0	0	0	0
hsa-miR-3605-5p	21.0942	0	0	0	0	6.2039	25.2409	12.9911	57.6738	8.85375	0	14.3118	22.0706	3.17257	18.6039	12.6842	7.82339	0	32.7043	3.69565	19.3568
hsa-miR-3605-3p	154.691	0	149.225	0	25.3169	87.8886	23.5582	30.3125	7.20922	42.7931	25.4407	26.4634	30.7069	30.4567	33.8252	22.253	30.4243	34.4846	24.5282	24.0217	34.4793
hsa-miR-361-5p	42.1884	40.6132	0	4.96396	51.7846	29.9855	0	34.976	39.6507	39.1041	40.3542	54.5469	52.7774	57.1063	29.8789	55.1874	9.56192	0	16.3522	33.2609	37.5038
hsa-miR-361-3p	217.974	423.537	303.596	94.3152	364.793	400.152	469.481	533.967	454.181	607.22	407.051	768.518	358.886	508.881	787	645.782	587.624	551.754	570.281	702.174	661.155
hsa-miR-3613-5p	42.1884	249.481	36.0199	173.739	89.7599	156.131	63.9436	102.929	93.7199	140.184	64.0403	74.5295	183.282	137.69	49.0466	94.5753	86.9266	66.3166	73.5847	49.8913	72.588
hsa-miR-3614-5p	0	0	0	24.8198	0	21.7137	0	1.33242	32.4415	0	12.2817	0.540069	0	3.80709	9.02006	0.22253	0	0	36.7924	3.69565	0
hsa-miR-3615	442.979	452.547	550.589	183.666	681.255	707.245	1036.56	1063.94	675.864	667.72	757.079	700.739	416.462	604.058	904.825	950.648	1060.5	697.651	833.96	1016.3	1007.16
hsa-miR-362-5p	0	0	0	14.8919	23.0154	46.5293	0	4.66346	0	25.0856	3.50906	9.4512	0	9.51772	2.25501	8.01108	10.4312	26.5266	0	5.54348	0
hsa-miR-363-5p	0	40.6132	0	24.8198	12.6584	0	0	9.66003	9.01153	24.3478	12.2817	13.5017	18.2322	5.71063	3.38252	11.5716	0.869266	7.95799	0	1.84783	7.8637
hsa-miR-363-3p	1800.04	3005.38	3473.34	1384.94	3238.26	4431.65	1706.28	530.635	656.039	844.795	1318.53	566.262	1367.41	582.484	728.934	634.433	299.027	798.452	529.401	288.261	403.468
hsa-miR-3656	189.848	191.462	190.391	34.7477	41.4276	42.3933	72.3572	35.3091	68.4876	37.6284	166.68	27.5435	189.039	80.5834	64.2679	18.0249	58.2408	82.2326	57.2325	36.9565	34.4793
hsa-miR-365a-5p	0	0	20.5828	0	3.4523	18.6117	0	0	0	0	0	2.70034	0	6.34515	0	0	0	0	0	5.54348	0
hsa-miR-365a-3p	0	0	0	9.92792	0	0	0	0	0	0	0	0.810103	6.71713	8.88321	3.94628	1.33518	0	0	0	1.84783	0
hsa-miR-365b-3p	0	0	0	9.92792	0	0	0	0	0	0	0	0.810103	6.71713	8.88321	3.94628	1.33518	0	0	0	1.84783	0
hsa-miR-3679-5p	0	17.4056	5.14569	0	17.2615	0	25.2409	1.33242	16.2207	0.737813	0	12.6916	22.0706	7.61418	7.3288	23.8107	0	21.2213	0	0	0
hsa-miR-3682-3p	0	0	0	0	0	0	0	0.999314	0	13.2806	6.14085	0.270034	0	0	0	0.66759	0	0	0	0	0
hsa-miR-3688-3p	0	0	0	0	0	0	0	0	0	8.85375	9.64991	0.540069	6.71713	3.80709	0	0.44506	0	2.65266	0	0	1.8147
hsa-miR-369-5p	0	0	0	0	9.20614	1.03398	0	14.3235	0	14.7563	27.1952	16.7421	5.75754	14.5938	11.2751	19.3601	29.555	21.2213	2.04402	24.0217	25.4058
hsa-miR-369-3p	0	0	0	0	4.60307	0	5.04818	28.647	0	20.6588	14.9135	14.8519	7.67671	13.9593	3.38252	18.47	3.47706	2.65266	10.2201	0	6.049
hsa-miR-3690	0	0	0	0	18.4123	0	0	0	0	0.737813	0	2.70034	0	0	0	0	0	13.2633	0	0	0
hsa-miR-3691-5p	0	0	0	0	0	10.3398	0	0	0	2.95125	0	2.43031	0	4.4416	0	3.33795	5.2156	0	6.13206	0	7.2588
hsa-miR-370-3p	0	0	195.536	54.6036	127.735	180.947	166.59	605.917	135.173	323.162	175.453	273.275	279.24	78.0453	227.756	423.475	466.796	228.129	226.886	314.13	145.176
hsa-miR-374a-5p	70.3141	29.0094	169.808	104.243	158.806	248.156	161.542	80.9444	115.348	197.734	70.1811	95.3221	112.272	141.497	117.825	119.721	86.9266	76.9273	94.0249	81.3044	75.0076
hsa-miR-374a-3p	0	23.2075	87.4768	14.8919	93.2122	50.6652	25.2409	27.9808	45.0576	73.7813	27.1952	35.6445	39.3432	46.3196	34.9527	42.9483	46.0711	45.0953	6.13206	24.0217	15.7274
hsa-miR-374b-5p	0	17.4056	41.1656	44.6756	24.1661	51.6992	0	68.6195	37.8484	101.08	47.3723	53.4668	41.2623	80.5834	45.1003	55.41	23.4702	63.6639	40.8804	49.8913	15.7274
hsa-miR-374b-3p	0	0	0	0	0	0	0	2.66484	0	2.21344	0	6.75086	0	8.24869	7.3288	6.89843	2.6078	29.1793	0	0	0
hsa-miR-375	372.665	319.104	277.867	312.729	231.304	374.302	181.734	83.2761	1333.71	83.3728	599.172	106.394	2915.23	260.151	342.199	147.315	16.5161	947.001	79.7168	53.587	231.677
hsa-miR-377-5p	0	0	0	0	0	0	0	10.9924	0	1.47563	0	3.51045	8.6363	0	0	1.33518	2.6078	0	0	5.54348	3.6294
hsa-miR-377-3p	0	0	0	0	0	0	0	4.99657	0	0	0	1.08014	13.4343	0	0	1.11265	0	0	0	1.84783	0
hsa-miR-378a-5p	0	0	0	4.96396	10.3569	0	0	6.32899	0	11.805	24.5634	6.21079	6.71713	3.17257	0.563754	6.23084	0	0	0	3.69565	17.5421
hsa-miR-378a-3p	2257.08	1891.41	1842.16	1662.93	4866.6	4020.13	1857.73	1449.34	2964.79	1178.29	2754.61	1743.34	4965.87	1255.07	1636.58	1392.82	1198.72	2191.1	1408.33	1029.24	1624.76
hsa-miR-378c	63.2827	63.8207	82.3311	168.775	472.966	341.215	26.9236	81.9437	245.114	73.0434	132.467	116.655	383.836	115.482	94.1469	96.3555	99.9656	79.5799	49.0565	46.1957	84.6859
hsa-miR-378d	0	40.6132	30.8742	109.207	332.572	229.544	23.5582	55.2953	176.626	42.0553	80.7083	82.3605	246.614	62.1824	61.4492	68.7618	73.8876	39.79	38.8364	35.1087	68.9586
hsa-miR-378f	14.0628	0	0	14.8919	33.3723	22.7476	6.73091	8.66072	14.4184	7.37813	10.5272	8.6411	11.5151	20.3045	7.89255	6.89843	3.47706	5.30533	4.08804	1.84783	4.2343
hsa-miR-378g	7.03141	0	0	0	12.6584	10.3398	3.36545	2.33173	27.0346	8.85375	7.89538	5.40069	8.6363	3.17257	4.51003	4.00554	3.47706	10.6107	0	3.69565	1.8147
hsa-miR-378i	175.785	121.84	123.497	109.207	333.723	347.418	119.474	109.591	203.66	98.1291	181.594	151.759	423.179	73.6037	118.388	108.15	95.6192	188.339	104.245	62.8261	104.648
hsa-miR-379-5p	56.2513	29.0094	138.934	89.3513	56.3876	56.8691	153.128	240.835	198.254	194.783	168.435	176.602	280.2	102.791	80.053	194.936	266.865	220.171	224.842	230.978	141.547
hsa-miR-379-3p	0	0	0	0	0	7.23788	0	4.99657	0	5.16469	0	3.24041	8.6363	0	0	4.67313	1.73853	15.916	0	3.69565	3.0245
hsa-miR-381-3p	140.628	17.4056	138.934	49.6396	84.0061	171.641	195.196	381.738	79.3014	163.057	162.294	225.749	282.119	99.6188	202.951	318.885	613.702	230.782	271.855	260.544	333.3
hsa-miR-382-5p	56.2513	29.0094	164.662	84.3873	90.9107	138.554	129.57	393.73	209.067	198.472	111.413	218.458	202.473	98.9843	115.006	376.298	395.516	151.202	177.83	197.717	303.055
hsa-miR-382-3p	0	0	0	0	0	0	0	8.66072	0	4.42688	0	4.59058	0	0	6.20129	8.45614	0	10.6107	20.4402	0	0
hsa-miR-3909	0	0	0	0	3.4523	0	0	11.9918	0	5.16469	0	15.1219	16.313	4.4416	10.1476	10.6814	6.95413	0	0	9.23913	4.2343
hsa-miR-3912-3p	0	0	0	4.96396	0	0	0	0	0	2.95125	14.0362	0	0	0	0	1.11265	3.47706	0	0	0	1.8147
hsa-miR-3913-5p	35.157	0	51.4569	14.8919	1.15077	14.4758	26.9236	4.66346	1.80231	4.42688	16.668	5.13065	10.5555	2.53806	13.5301	4.4506	11.3005	0	0	0	12.7029
hsa-miR-3928-3p	35.157	0	0	9.92792	9.20614	0	0	6.32899	18.0231	10.3294	0	5.40069	10.5555	12.0558	0.563754	5.11819	0	0	2.04402	9.23913	3.0245
hsa-miR-3940-3p	0	0	15.4371	0	1.15077	0	0	0	0	0	0	0.540069	0	0	0	2.44783	0	0	10.2201	5.54348	0
hsa-miR-3960	63.2827	23.2075	20.5828	19.8558	5.75384	49.6312	35.3373	7.3283	12.6161	2.95125	61.4085	4.59058	67.1713	15.2284	7.89255	0.22253	4.34633	0	14.3081	7.39131	8.46859
hsa-miR-409-5p	0	0	0	0	0	1.03398	0	8.32761	1.80231	8.85375	0	6.75086	5.75754	6.97966	1.12751	7.78855	4.34633	13.2633	0	3.69565	3.0245
hsa-miR-409-3p	1195.34	435.141	694.669	218.414	698.516	812.711	895.211	2597.55	618.191	1310.36	578.994	1828.67	1303.12	506.343	507.378	2220.18	4235.06	1586.29	2074.68	2452.07	2088.72
hsa-miR-410-3p	0	0	0	4.96396	11.5077	0	0	17.3214	0	5.9025	0	11.0714	12.4747	9.51772	8.45631	13.1293	8.69266	0	14.3081	7.39131	2.4196
hsa-miR-411-5p	105.471	0	0	9.92792	18.4123	8.27187	30.2891	59.6257	0	39.8419	25.4407	30.2438	72.9288	8.24869	22.5501	47.844	119.089	53.0533	32.7043	31.413	33.2695
hsa-miR-411-3p	0	0	0	0	0	9.30585	35.3373	13.6573	27.0346	8.11594	0	11.8815	32.626	6.97966	2.81877	19.5826	23.4702	15.916	2.04402	20.3261	22.9862
hsa-miR-412-5p	0	0	0	0	0	0	0	0	0	5.16469	0	1.35017	10.5555	0	0	1.33518	6.08486	0	0	7.39131	4.8392
hsa-miR-421	0	34.8113	10.2914	29.7838	60.9907	19.6457	0	47.3008	55.8715	94.44	78.9538	53.7368	44.1411	62.1824	31.0065	68.9843	60.8486	159.16	77.6727	31.413	95.5741
hsa-miR-422a	0	5.80188	0	0	20.7138	5.16992	1.68273	3.99725	19.8254	1.47563	5.26359	4.05051	12.4747	5.71063	5.63754	6.23084	2.6078	0	2.04402	1.84783	4.2343
hsa-miR-423-5p	66967.1	74444	95704.8	56048.1	121136	108496	68907.7	81581	56412.2	53144.6	84588.5	101732	125653	60024.5	95452.5	98273.3	131984	95509.2	101293	105940	186726
hsa-miR-423-3p	5498.56	4885.18	8835.16	2511.76	6561.68	7059	6801.58	18994.3	8952.05	16339.6	11601.8	19718.4	7384.04	13729.6	19049.8	16089.6	24723.7	15313.8	19814.7	24613	20190.3
hsa-miR-424-5p	0	0	0	0	0	0	0	2.66484	16.2207	3.68906	12.2817	4.05051	0	14.5938	6.76504	2.89289	10.4312	0	0	1.84783	4.2343
hsa-miR-424-3p	154.691	110.236	452.821	168.775	374	203.695	173.321	184.207	127.964	199.209	257.916	239.52	192.877	141.497	144.321	149.985	120.828	103.454	169.654	160.761	107.672
hsa-miR-425-5p	450.01	690.424	504.278	491.432	783.673	849.934	498.087	862.074	701.097	1297.07	966.745	1174.65	854.034	941.62	1584.15	890.565	940.546	888.642	1017.92	1321.2	1114.23
hsa-miR-425-3p	0	0	0	44.6756	73.6492	26.8836	1.68273	128.578	81.1037	112.148	67.5494	112.874	117.07	142.131	62.0129	76.7729	66.9335	87.5379	94.0249	131.196	150.015
hsa-miR-4286	0	0	0	0	0	0	0	4.33036	0	5.9025	10.5272	4.86062	0	0	0	2.89289	2.6078	0	0	1.84783	0
hsa-miR-429	21.0942	0	10.2914	9.92792	13.8092	0	0	0.333105	25.2323	5.9025	9.64991	3.51045	65.2521	10.7867	1.12751	5.56325	0	0	0	3.69565	8.46859
hsa-miR-431-5p	0	0	0	0	1.15077	14.4758	33.6545	32.6442	0	6.64031	0	13.5017	1.91918	0	2.81877	16.0222	15.6468	23.874	36.7924	9.23913	11.4931
hsa-miR-432-5p	260.162	52.2169	113.205	39.7117	111.624	158.199	143.032	338.101	104.534	196.258	109.658	200.095	120.908	98.9843	140.375	339.803	503.305	175.076	208.49	271.63	365.359
hsa-miR-4326	0	0	5.14569	14.8919	26.4677	14.4758	0	92.9362	23.43	58.2872	38.5996	58.8675	33.5856	85.6595	65.9592	46.5088	40.8555	18.5686	71.5407	59.1304	38.1087
hsa-miR-433-3p	0	17.4056	5.14569	14.8919	65.5938	88.9226	38.7027	146.233	90.1153	50.9091	39.4769	66.6985	75.8076	22.8425	31.5702	96.578	165.161	21.2213	38.8364	79.4565	93.7594
hsa-miR-4429	0	11.6038	0	0	9.20614	5.16992	15.1445	2.99794	0	3.68906	0	5.94075	12.4747	8.24869	25.9327	3.56048	6.95413	15.916	2.04402	1.84783	4.2343
hsa-miR-4433a-3p	0	0	20.5828	0	1.15077	0	8.41363	1.66552	5.40692	2.95125	2.63179	1.35017	1.91918	2.53806	3.38252	5.34072	7.82339	5.30533	0	5.54348	25.4058
hsa-miR-4433b-5p	499.23	295.896	457.967	158.847	170.314	132.35	583.906	1662.52	1499.52	1078.68	1021.14	733.953	300.351	819.793	832.1	1412.62	2371.36	2387.4	1142.61	1507.83	2871.46
hsa-miR-4433b-3p	1701.6	493.16	504.278	14.8919	302.652	50.6652	708.428	681.865	537.087	422.767	536.886	330.252	120.908	268.4	762.759	1213.9	2261.83	1607.51	1242.76	1354.46	3308.2
hsa-miR-4435	0	0	0	14.8919	0	0	0	12.658	1.80231	16.9697	8.77264	24.5731	0	8.24869	8.45631	8.9012	11.3005	13.2633	4.08804	20.3261	7.2588
hsa-miR-4443	7.03141	0	0	0	0	9.30585	0	7.3283	0	4.42688	0.877264	3.24041	0	0	5.63754	0.66759	0	0	0	1.84783	0
hsa-miR-4446-3p	0	75.4245	262.43	9.92792	138.092	62.039	97.5981	314.784	237.904	469.987	334.238	302.168	81.5651	365.48	437.473	395.658	709.321	397.9	705.187	962.717	760.964
hsa-miR-4448	0	0	0	0	0	0	0	0	9.01153	2.21344	33.336	0.540069	0	1.90354	0.563754	3.11542	0	0	2.04402	1.84783	3.6294
hsa-miR-4449	0	0	0	0	0	0	0	0.333105	0	7.37813	0	1.08014	8.6363	0	3.94628	2.00277	0	0	0	5.54348	0
hsa-miR-4466	7.03141	34.8113	20.5828	0	31.0707	26.8836	15.1445	26.9815	7.20922	5.9025	88.6037	3.24041	213.988	7.61418	6.76504	4.89566	33.0321	0	28.6163	0	5.4441
hsa-miR-4467	0	0	0	0	0	0	0	2.99794	0	0	0	5.13065	0	0	0	1.55771	0	0	4.08804	3.69565	11.4931
hsa-miR-4470	0	0	25.7285	0	0	0	0	8.66072	0	2.21344	0	2.97038	0	0	15.7851	11.349	16.5161	0	2.04402	1.84783	19.9617
hsa-miR-4473	0	0	15.4371	0	9.20614	43.4273	0	2.33173	0	0	0	8.10103	0	12.6903	2.81877	3.33795	0.869266	0	8.17608	0	6.6539
hsa-miR-4482-3p	0	0	0	0	0	0	0	0	9.01153	0	0	0	0	0	0	0	0	0	0	0	0
hsa-miR-4488	0	0	10.2914	74.4594	42.5784	20.6797	95.9154	5.99588	97.3245	20.6588	50.0041	9.18117	6.71713	25.3806	27.6239	12.2392	2.6078	37.1373	22.4842	9.23913	21.1715
hsa-miR-4489	0	0	0	0	0	15.5098	0	1.99863	18.0231	0	0	0.540069	0	0	0	0	0	0	0	0	0
hsa-miR-4492	0	0	0	0	0	0	0	0	12.6161	0	0	0	9.59589	0	0.563754	0.89012	0	0	0	1.84783	3.0245
hsa-miR-4498	0	0	0	0	11.5077	0	0	0	0	2.95125	0	6.48082	0	1.90354	0	1.55771	13.039	0	2.04402	0	0
hsa-miR-449c-5p	0	34.8113	0	29.7838	0	0	0	0.999314	0	0	0	0	2.87877	0	0	0	0	0	0	0	0
hsa-miR-4504	0	0	0	0	1.15077	19.6457	0	0	0	0	6.14085	0.270034	0	7.61418	2.25501	1.55771	0	0	2.04402	0	1.8147
hsa-miR-4508	0	0	0	19.8558	19.5631	5.16992	0	4.66346	5.40692	9.59156	3.50906	16.7421	118.989	10.1522	29.8789	10.6814	18.2546	5.30533	18.3962	5.54348	13.3078
hsa-miR-450a-5p	105.471	0	0	69.4954	80.5538	57.9031	33.6545	43.3036	84.7083	74.5191	38.5996	36.1846	50.8582	34.8983	14.6576	20.4728	52.156	0	36.7924	24.0217	37.5038
hsa-miR-450b-5p	0	34.8113	0	0	18.4123	0	0	15.3228	34.2438	9.59156	7.01811	12.6916	40.3028	26.6496	11.8388	14.4645	13.039	0	22.4842	14.7826	1.8147
hsa-miR-4510	0	0	5.14569	29.7838	12.6584	19.6457	8.41363	2.99794	1.80231	2.21344	4.38632	8.91113	3.83836	3.80709	5.07378	6.89843	7.82339	7.95799	4.08804	1.84783	3.6294
hsa-miR-4511	0	0	0	0	0	0	0	1.66552	0	14.7563	0	0.540069	0	5.71063	3.38252	0.89012	0	0	2.04402	0	2.4196
hsa-miR-4516	56.2513	0	10.2914	0	13.8092	0	0	0.999314	1.80231	0.737813	40.3542	1.08014	0	3.80709	0	0.22253	0	0	14.3081	1.84783	3.6294
hsa-miR-451a	34003.9	51880.4	61573.4	78202.2	76139.4	63855.7	25646.4	7919.56	16346.9	9365.05	40299.8	24009	36654.4	11157.3	38219.1	11772.1	3080.68	22088.7	10481.7	7252.72	35041.2
hsa-miR-452-5p	70.3141	0	0	19.8558	0	18.6117	0	7.3283	27.0346	26.5613	17.5453	12.1515	1.91918	10.1522	58.6304	30.9317	8.69266	47.748	8.17608	22.1739	6.049
hsa-miR-4525	0	0	0	0	29.92	15.5098	0	0.333105	0	0	0	1.62021	0	0	3.38252	0.66759	0	7.95799	0	0	0
hsa-miR-4532	0	52.2169	0	4.96396	0	0	0	0	0	0	0	0	0	0	0	0	0	0	0	0	0
hsa-miR-4533	0	0	0	0	0	0	0	4.66346	1.80231	12.5428	10.5272	5.67072	0	7.61418	0.563754	4.89566	19.1238	0	20.4402	11.087	0.6049
hsa-miR-454-5p	0	29.0094	0	0	11.5077	32.0535	0	15.6559	36.0461	27.2991	13.159	14.8519	23.9897	12.6903	33.8252	23.8107	14.7775	21.2213	12.2641	12.9348	7.8637
hsa-miR-454-3p	91.4083	0	20.5828	0	27.6184	10.3398	26.9236	13.3242	0	27.2991	16.668	20.2526	6.71713	9.51772	1.12751	21.3629	8.69266	5.30533	40.8804	18.4783	16.3323
hsa-miR-455-5p	0	17.4056	41.1656	24.8198	49.483	18.6117	0	3.66415	12.6161	12.5428	18.4226	8.6411	10.5555	10.7867	10.1476	4.67313	0	0	6.13206	7.39131	6.049
hsa-miR-455-3p	0	0	0	0	5.75384	0	0	1.66552	0	4.42688	0	5.40069	7.67671	0	0	0.66759	0	0	0	0	0
hsa-miR-4635	0	0	0	29.7838	0	0	0	0	0	0	0	1.35017	8.6363	0	1.69126	0.66759	3.47706	0	0	0	0
hsa-miR-4638-5p	0	0	0	0	0	0	0	0	0	3.68906	0	3.51045	0	0	2.81877	1.11265	12.1697	0	0	7.39131	9.67839
hsa-miR-4644	0	0	0	0	0	0	0	0.333105	0	0	0	2.43031	0	4.4416	1.69126	0	0	0	6.13206	0	3.6294
hsa-miR-4645-3p	0	0	0	0	0	0	20.1927	2.33173	0	3.68906	0	9.18117	0	2.53806	3.94628	2.89289	6.95413	0	0	0	0
hsa-miR-4646-5p	0	0	0	0	0	0	0	0	0	0	2.63179	0	1.91918	0	6.76504	0.66759	6.08486	0	0	0	0
hsa-miR-4654	0	0	0	0	0	0	23.5582	1.33242	0	8.11594	0	2.16027	0	12.6903	2.81877	8.23361	6.08486	15.916	0	1.84783	9.67839
hsa-miR-4659a-3p	0	0	0	0	26.4677	0	0	11.9918	0	3.68906	0	4.32055	0	3.80709	19.7314	5.34072	2.6078	0	0	9.23913	0
hsa-miR-4659b-3p	0	0	20.5828	0	1.15077	0	0	4.66346	32.4415	12.5428	15.7908	4.86062	0	5.71063	27.6239	17.5799	19.9931	0	6.13206	14.7826	17.5421
hsa-miR-4661-5p	0	0	0	0	8.05538	0	23.5582	49.2995	0	0	13.159	1.89024	0	1.26903	0	8.45614	18.2546	0	2.04402	0	0
hsa-miR-4662a-5p	0	0	0	0	0	0	0	7.99451	30.6392	19.1831	8.77264	13.2317	0	1.26903	0	5.56325	19.9931	21.2213	0	5.54348	5.4441
hsa-miR-4664-3p	0	0	0	0	0	0	0	3.33105	0	0	0	3.78048	0	0	3.38252	4.89566	9.56192	0	2.04402	1.84783	0
hsa-miR-4665-5p	0	0	0	4.96396	23.0154	41.3593	1.68273	60.625	12.6161	44.2688	39.4769	43.7456	30.7069	31.7257	74.4155	46.7313	53.0252	53.0533	53.1445	62.8261	136.102
hsa-miR-4667-5p	0	0	0	0	0	9.30585	0	2.33173	3.60461	1.47563	0	2.70034	12.4747	0.634515	5.07378	3.11542	0	0	0	0	3.0245
hsa-miR-4676-3p	0	0	0	0	0	2.06797	0	4.33036	0	4.42688	6.14085	2.97038	1.91918	0.634515	0	3.56048	0	0	0	0	0
hsa-miR-4677-3p	0	0	0	4.96396	9.20614	0	0	1.66552	0	5.16469	0	2.43031	0	12.6903	7.89255	4.00554	0	0	4.08804	14.7826	6.049
hsa-miR-4683	0	0	0	0	13.8092	31.0195	0	0	0	0	6.14085	4.05051	0	0	0	0	0	0	0	0	0
hsa-miR-4685-3p	0	0	0	0	0	0	0	2.99794	0	0.737813	0	1.35017	0	14.5938	8.45631	5.78578	0	0	0	3.69565	15.7274
hsa-miR-4700-5p	0	0	30.8742	19.8558	0	0	0	0	0	0.737813	0	0.540069	0	0	0	0	6.95413	0	0	0	0
hsa-miR-4701-3p	0	0	0	0	0	0	0	0	0	0	0	1.89024	0	0	0	1.11265	9.56192	0	0	5.54348	3.6294
hsa-miR-4706	0	0	0	0	0	0	0	0	0	0.737813	0	0	5.75754	0	9.02006	0	0	0	0	0	0
hsa-miR-4708-3p	0	0	0	0	0	8.27187	0	0	0	0	0	0.810103	0	0	5.63754	0	0	0	0	0	0
hsa-miR-4726-5p	0	0	20.5828	0	0	0	0	0.999314	0	0	0	0	0	2.53806	0	0	0	0	6.13206	0	0
hsa-miR-4732-5p	133.597	110.236	190.391	302.802	241.661	175.777	111.06	19.3201	61.2784	46.4822	90.3582	49.6863	129.545	55.2028	182.656	21.5854	18.2546	183.034	22.4842	11.087	59.8851
hsa-miR-4732-3p	161.722	98.632	164.662	129.063	138.092	254.36	129.57	18.3207	36.0461	42.7931	131.59	41.3152	99.7973	65.355	78.9255	30.2641	20.8624	100.801	4.08804	9.23913	42.9479
hsa-miR-4738-3p	0	0	15.4371	0	0	0	0	2.33173	0	0	0	0.540069	0	6.34515	5.07378	5.34072	0.869266	0	0	0	3.0245
hsa-miR-4741	0	0	0	0	3.4523	0	0	0.999314	0	0.737813	0	0.540069	0	11.4213	4.51003	0.22253	0	0	0	5.54348	0
hsa-miR-4742-5p	0	0	5.14569	0	1.15077	0	0	11.6587	0	4.42688	0	4.86062	6.71713	5.71063	8.45631	8.67867	0	0	0	3.69565	0
hsa-miR-4742-3p	0	0	0	0	4.60307	24.8156	0	0	0	2.21344	7.89538	0.810103	10.5555	2.53806	9.58381	3.33795	0	0	2.04402	7.39131	0
hsa-miR-4745-5p	0	0	0	0	8.05538	7.23788	0	4.99657	28.8369	0	0	0.540069	0	0	0	2.00277	0	2.65266	0	0	0
hsa-miR-4746-5p	42.1884	0	36.0199	29.7838	78.2522	2.06797	23.5582	25.9822	9.01153	32.4638	21.9316	30.5139	0	26.0151	22.5501	20.2502	51.2867	31.832	51.1005	25.8696	44.1577
hsa-miR-4748	0	0	0	0	0	0	20.1927	4.66346	0	5.16469	0	5.67072	0	0	0	8.9012	0	23.874	0	0	3.0245
hsa-miR-4750-5p	0	0	0	0	0	0	0	0.333105	0	1.47563	0	2.70034	0	0	5.07378	2.2253	15.6468	26.5266	0	12.9348	9.07349
hsa-miR-4755-5p	56.2513	58.0188	0	0	0	5.16992	0	13.3242	0	4.42688	0	8.37106	0	0	0	3.56048	4.34633	0	0	1.84783	11.4931
hsa-miR-4762-3p	0	0	0	0	10.3569	0	0	0	9.01153	0	0	0.270034	0	0	0	1.55771	0	0	0	1.84783	0
hsa-miR-4777-3p	0	0	0	0	0	0	0	0	0	0	16.668	0	5.75754	0	7.3288	1.11265	0	0	0	0	0
hsa-miR-4800-3p	70.3141	0	10.2914	0	0	0	0	0	0	0	0	0	0	0	0	0	0	0	2.04402	0	0
hsa-miR-4804-5p	0	0	0	0	0	0	0	0	0	0	0	4.59058	0	0.634515	1.12751	0	0	0	8.17608	11.087	1.8147
hsa-miR-483-5p	428.916	307.5	149.225	129.063	467.212	543.875	116.108	44.636	583.947	98.8669	340.379	93.7019	1370.29	158.629	104.858	119.499	144.298	485.438	183.962	35.1087	214.134
hsa-miR-483-3p	28.1256	40.6132	0	99.2792	28.7692	28.9515	67.3091	15.6559	104.534	6.64031	124.572	13.7717	23.9897	21.5735	4.51003	6.00831	17.3853	15.916	36.7924	12.9348	40.5283
hsa-miR-484	752.361	417.736	926.225	570.855	788.276	676.225	548.569	2465.31	1286.85	1630.57	1736.98	1939.39	965.347	1550.12	1174.3	1753.98	2440.03	1620.78	1890.72	2550	2561.15
hsa-miR-485-5p	133.597	34.8113	97.7682	29.7838	54.0861	63.073	70.6745	134.907	18.0231	78.9459	100.885	146.899	95.9589	19.67	66.5229	174.018	314.674	106.107	167.61	236.522	200.222
hsa-miR-485-3p	0	34.8113	56.6026	0	39.1261	38.2574	1.68273	221.514	7.20922	112.148	82.4628	85.3308	45.1007	43.147	51.3016	108.15	199.931	129.981	128.773	123.804	134.893
hsa-miR-486-5p	225539	211502	240716	201209	211055	216601	124774	70212.8	80054.8	59080.3	263716	70000.7	139355	59497.8	103534	62503.6	48199.1	100411	56020.4	40809.2	148638
hsa-miR-486-3p	1314.87	771.65	807.874	1305.52	1001.17	983.318	513.232	387.401	520.866	419.815	1408.01	547.9	1634.18	545.683	758.812	389.65	517.213	663.166	455.816	347.391	887.388
hsa-miR-487a-5p	56.2513	0	0	9.92792	9.20614	17.5777	0	9.66003	27.0346	13.2806	21.0543	6.21079	3.83836	0	0	10.0139	19.1238	26.5266	10.2201	5.54348	1.8147
hsa-miR-487b-5p	0	0	0	0	0	0	40.3854	2.66484	0	0	0	1.62021	0	0	0	0.44506	6.95413	0	0	5.54348	0
hsa-miR-487b-3p	0	0	0	0	0	0	0	8.32761	3.60461	4.42688	10.5272	2.43031	1.91918	0.634515	6.20129	8.67867	4.34633	2.65266	2.04402	12.9348	9.67839
hsa-miR-490-3p	0	0	15.4371	0	0	0	0	24.9828	14.4184	20.6588	0	8.6411	5.75754	0	1.69126	5.34072	31.2936	0	8.17608	5.54348	1.8147
hsa-miR-491-5p	0	0	0	0	0	0	0	1.66552	0	9.59156	14.9135	4.05051	0	0	1.12751	5.34072	0	10.6107	0	0	0
hsa-miR-493-5p	0	0	10.2914	0	51.7846	65.141	75.7227	63.623	14.4184	88.5375	1.75453	69.9389	86.363	32.3602	35.5165	70.7645	40.8555	84.8853	63.3646	46.1957	45.3675
hsa-miR-493-3p	0	0	72.0397	19.8558	46.0307	22.7476	75.7227	110.258	30.6392	43.5309	65.7948	65.3483	41.2623	3.80709	57.5029	98.3583	200.8	124.675	42.9244	86.8478	91.9447
hsa-miR-494-3p	0	0	15.4371	0	0	0	0	15.3228	0	18.4453	0	9.18117	26.8685	1.26903	15.2214	4.67313	16.5161	26.5266	20.4402	12.9348	2.4196
hsa-miR-495-3p	0	0	15.4371	0	0	20.6797	104.329	53.6298	14.4184	45.0066	18.4226	46.7159	25.9089	29.8222	16.9126	48.0665	70.4105	87.5379	42.9244	68.3696	125.819
hsa-miR-499a-5p	0	0	0	9.92792	46.0307	26.8836	0	12.658	0	15.4941	30.7043	18.3623	94.0398	5.07612	11.8388	15.132	20.8624	39.79	4.08804	12.9348	10.8882
hsa-miR-5009-5p	0	0	0	4.96396	5.75384	4.13593	0	0.333105	14.4184	0.737813	0	1.89024	0	0	5.07378	1.11265	2.6078	0	0	0	10.8882
hsa-miR-500a-5p	0	0	0	9.92792	10.3569	0	0	0	0	0	0	0	0	0	0	0	0	0	0	0	0
hsa-miR-500a-3p	49.2198	0	51.4569	84.3873	55.2369	18.6117	13.4618	32.3111	19.8254	8.85375	35.9678	24.8432	51.8178	10.7867	21.9864	15.5771	6.08486	2.65266	10.2201	14.7826	21.1715
hsa-miR-500b-5p	0	0	0	9.92792	10.3569	0	0	0	0	0	0	0	0	0	0	0	0	0	0	0	0
hsa-miR-501-5p	0	0	0	0	0	8.27187	0	0	0	4.42688	12.2817	2.70034	0	3.17257	3.38252	0.44506	0	0	0	7.39131	0
hsa-miR-501-3p	210.942	272.688	246.993	302.802	207.138	180.947	33.6545	53.9629	86.5107	71.5678	203.525	80.4702	135.302	74.2382	87.9456	73.88	13.039	82.2326	57.2325	44.3478	92.5496
hsa-miR-5010-5p	0	133.443	51.4569	19.8558	25.3169	17.5777	25.2409	11.9918	5.40692	5.16469	12.2817	12.9616	29.7473	29.8222	23.6777	23.8107	23.4702	21.2213	4.08804	38.8044	39.3185
hsa-miR-5010-3p	0	0	0	44.6756	4.60307	15.5098	0	17.3214	23.43	28.0369	0	19.9825	11.5151	14.5938	16.3489	17.5799	13.9083	31.832	16.3522	24.0217	18.7519
hsa-miR-502-3p	14.0628	0	108.06	79.4234	70.1968	33.0875	68.9918	38.6401	28.8369	10.3294	64.0403	33.7543	52.7774	13.3248	8.45631	24.2558	9.56192	2.65266	0	14.7826	21.7764
hsa-miR-503-5p	0	81.2264	20.5828	54.6036	94.363	37.2234	20.1927	38.307	19.8254	59.7628	15.7908	84.7908	49.8986	17.1319	63.1404	57.6353	18.2546	7.95799	30.6603	42.5	32.0597
hsa-miR-504-5p	0	5.80188	25.7285	0	3.4523	0	0	13.6573	21.6277	31.7259	5.26359	16.4721	14.3938	5.07612	15.7851	13.5743	8.69266	0	32.7043	9.23913	0
hsa-miR-504-3p	0	0	0	0	0	0	0	0	0	0	0	0	0	0	1.69126	1.11265	10.4312	0	0	1.84783	0
hsa-miR-505-5p	63.2827	214.67	138.934	14.8919	88.6091	53.7671	119.474	181.542	138.778	282.582	203.525	172.822	124.747	137.69	129.1	136.633	169.507	98.1486	153.301	206.957	132.473
hsa-miR-505-3p	0	58.0188	20.5828	0	39.1261	24.8156	87.5018	49.6326	37.8484	68.6166	31.5815	69.6688	7.67671	39.3399	24.8052	48.0665	26.9472	37.1373	28.6163	48.0435	34.4793
hsa-miR-506-3p	0	0	0	0	0	0	0	0	10.8138	0	0	0	16.313	0	0	0	0	0	0	0	0
hsa-miR-508-3p	0	0	41.1656	0	0	0	0	0.666209	0	0	0	0	0	6.34515	0	0	0	0	0	0	0
hsa-miR-509-3p	0	0	0	0	0	0	0	0	28.8369	0.737813	0	0	9.59589	0	0.563754	1.55771	0	5.30533	0	0	0
hsa-miR-5100	0	0	0	0	14.96	21.7137	0	4.99657	23.43	0.737813	3.50906	5.40069	0	8.24869	2.25501	3.78301	1.73853	0	0	5.54348	15.1225
hsa-miR-511-5p	91.4083	34.8113	46.3112	44.6756	59.8399	13.4418	57.2127	27.9808	16.2207	22.8722	91.2355	23.493	86.363	31.0912	56.9391	26.9261	16.5161	7.95799	53.1445	12.9348	41.1332
hsa-miR-514a-3p	0	0	10.2914	9.92792	0	1.03398	0	0.999314	0	3.68906	20.1771	0.270034	6.71713	0	4.51003	3.33795	0	39.79	0	0	0.6049
hsa-miR-516a-5p	0	0	0	9.92792	0	0	38.7027	0	0	0	0	0.810103	0	0	0	0	0	0	0	0	0
hsa-miR-517a-3p	0	0	0	0	0	0	0	0	0	0	19.2998	0.810103	0	0	0	0	0	21.2213	0	0	0
hsa-miR-517b-3p	0	0	0	0	0	0	0	0	0	0	19.2998	0.810103	0	0	0	0	0	21.2213	0	0	0
hsa-miR-5187-5p	0	46.4151	10.2914	0	6.90461	0	0	11.6587	0	14.0184	0	9.99127	4.79795	8.88321	16.9126	4.22807	31.2936	21.2213	32.7043	12.9348	6.6539
hsa-miR-5189-5p	0	0	5.14569	0	10.3569	0	0	8.66072	32.4415	22.1344	17.5453	37.5348	6.71713	13.3248	16.3489	16.2447	9.56192	50.4006	22.4842	20.3261	16.9372
hsa-miR-5189-3p	0	0	15.4371	0	0	0	0	0	9.01153	3.68906	0	27.5435	0	6.97966	4.51003	0	0	18.5686	10.2201	7.39131	0
hsa-miR-5193	0	0	0	0	0	0	18.51	9.66003	0	1.47563	0	14.8519	0	20.3045	2.25501	11.5716	2.6078	0	16.3522	9.23913	10.8882
hsa-miR-5196-3p	91.4083	98.632	20.5828	0	5.75384	0	15.1445	0	0	0	15.7908	0	0	0	2.81877	0	5.2156	0	6.13206	0	0
hsa-miR-532-5p	1209.4	2616.65	1620.89	1712.57	1907.97	1869.44	595.685	1300.44	937.199	1274.94	2138.77	1295.35	1712.87	1139.59	881.711	1237.27	831.018	944.348	960.689	1071.74	1308.4
hsa-miR-541-3p	0	0	0	0	0	0	0	0.999314	0	0	0	2.16027	0	0	0	5.11819	4.34633	0	0	9.23913	1.8147
hsa-miR-542-3p	0	0	0	29.7838	9.20614	31.0195	0	7.3283	23.43	2.95125	0	15.392	17.2726	3.80709	1.12751	7.78855	0.869266	5.30533	0	14.7826	11.4931
hsa-miR-543	421.884	52.2169	355.053	69.4954	181.821	358.792	175.004	555.951	126.161	335.705	281.602	508.475	330.099	271.572	523.727	567.674	658.034	535.838	643.866	704.022	820.849
hsa-miR-548a-3p	0	0	0	0	0	0	0	8.66072	7.20922	2.95125	8.77264	5.40069	0	3.17257	0	10.904	12.1697	0	4.08804	0	4.8392
hsa-miR-548ad-5p	0	0	0	9.92792	5.75384	25.8496	21.8754	2.66484	0	0	13.159	3.51045	37.424	19.0354	6.76504	1.55771	0	0	0	1.84783	7.8637
hsa-miR-548ae-5p	0	0	0	9.92792	5.75384	25.8496	21.8754	2.66484	0	0	13.159	3.51045	37.424	19.0354	6.76504	1.55771	0	0	0	1.84783	7.8637
hsa-miR-548ag	0	0	0	0	0	0	0	3.66415	0	0.737813	3.50906	3.51045	0.959589	5.07612	2.25501	1.11265	0	7.95799	6.13206	7.39131	12.098
hsa-miR-548ah-3p	0	0	0	4.96396	14.96	20.6797	0	8.66072	34.2438	6.64031	0	5.67072	41.2623	2.53806	3.94628	7.56602	4.34633	0	0	1.84783	3.0245
hsa-miR-548av-3p	0	0	0	4.96396	14.96	20.6797	0	8.66072	34.2438	6.64031	0	5.67072	41.2623	2.53806	3.94628	7.56602	4.34633	0	0	1.84783	3.0245
hsa-miR-548am-3p	0	0	0	4.96396	11.5077	23.7816	0	7.99451	34.2438	5.9025	2.63179	7.83099	21.111	10.7867	10.1476	9.79132	17.3853	10.6107	8.17608	3.69565	15.7274
hsa-miR-548ap-5p	0	0	10.2914	0	3.4523	2.06797	5.04818	6.66209	5.40692	14.0184	6.14085	8.6411	9.59589	11.4213	5.07378	7.78855	13.039	7.95799	10.2201	12.9348	1.8147
hsa-miR-548aq-3p	0	0	0	0	0	0	0	0	19.8254	8.85375	0	1.62021	0	1.26903	1.69126	2.67036	0.869266	0	2.04402	0	0.6049
hsa-miR-548ar-3p	0	0	0	0	0	0	0	0	21.6277	0	0	1.08014	25.9089	3.80709	5.07378	0	0	0	0	0	0
hsa-miR-548ay-5p	0	0	0	9.92792	5.75384	36.1894	21.8754	8.32761	0	0.737813	15.7908	7.83099	37.424	31.0912	12.4026	4.67313	3.47706	0	6.13206	14.7826	14.5176
hsa-miR-548az-5p	0	0	0	0	0	8.27187	0	0	0	0.737813	0	1.35017	0	9.51772	3.38252	2.00277	3.47706	0	0	3.69565	0.6049
hsa-miR-548b-5p	0	0	0	0	0	0	0	0	0	0	0	0.540069	0	0	6.76504	0	0	0	2.04402	12.9348	0
hsa-miR-548d-5p	0	0	20.5828	9.92792	5.75384	36.1894	21.8754	16.9883	0	11.0672	16.668	19.4425	39.3432	36.8019	12.4026	7.34349	6.95413	2.65266	12.2641	31.413	16.3323
hsa-miR-548e-3p	0	17.4056	0	0	25.3169	4.13593	0	16.3221	1.80231	14.0184	11.4044	6.75086	15.3534	1.26903	5.63754	15.132	12.1697	0	20.4402	18.4783	7.2588
hsa-miR-548f-3p	0	0	0	14.8919	17.2615	14.4758	0	6.32899	0	4.42688	15.7908	0.810103	15.3534	13.9593	6.76504	1.11265	0.869266	0	2.04402	0	3.6294
hsa-miR-548j-5p	0	0	46.3112	0	35.6738	19.6457	45.4336	67.9533	64.883	220.606	42.986	112.604	65.2521	94.5427	73.8517	56.3001	86.0573	71.6219	122.641	158.913	44.7626
hsa-miR-548j-3p	0	0	0	0	17.2615	0	0	6.32899	0	5.9025	0	11.3414	4.79795	8.24869	9.02006	5.56325	0	0	24.5282	9.23913	12.098
hsa-miR-548k	0	0	0	4.96396	2.30154	0	0	0	0	9.59156	0.877264	10.5313	0	5.07612	14.0938	8.45614	3.47706	0	10.2201	0	0
hsa-miR-548o-3p	0	63.8207	0	0	8.05538	46.5293	0	29.3132	27.0346	37.6284	40.3542	38.3449	15.3534	26.0151	62.0129	62.5309	81.711	58.3586	59.2766	38.8044	67.1439
hsa-miR-548p	0	0	0	4.96396	14.96	20.6797	0	8.66072	34.2438	6.64031	0	5.67072	41.2623	2.53806	3.94628	7.56602	4.34633	0	0	1.84783	3.0245
hsa-miR-548q	0	0	30.8742	0	6.90461	0	0	0	0	2.21344	7.01811	2.97038	0.959589	0	0.563754	1.55771	0	0	0	0	0
hsa-miR-550a-5p	63.2827	23.2075	30.8742	24.8198	26.4677	19.6457	42.0682	32.3111	12.6161	34.6772	42.1087	27.2735	14.3938	10.1522	54.6841	24.9234	19.1238	5.30533	22.4842	24.0217	19.3568
hsa-miR-550a-3-5p	63.2827	23.2075	30.8742	24.8198	26.4677	19.6457	42.0682	32.3111	12.6161	34.6772	42.1087	27.2735	14.3938	10.1522	54.6841	24.9234	19.1238	5.30533	22.4842	24.0217	19.3568
hsa-miR-552-3p	0	0	0	0	0	0	0	1.99863	0	0	0	4.05051	5.75754	8.24869	0	1.78024	0	0	0	0	0.6049
hsa-miR-556-5p	0	0	0	0	0	0	0	14.3235	10.8138	14.7563	0	7.83099	0	10.1522	8.45631	11.7941	13.9083	13.2633	2.04402	5.54348	9.07349
hsa-miR-5588-5p	0	0	10.2914	0	0	0	0	0	0	0	0	0.540069	0	0	0	0.44506	0	0	0	5.54348	0
hsa-miR-5683	0	0	0	0	0	0	0	0	0	0	0	0	0	9.51772	0	0	0	13.2633	0	0	0
hsa-miR-5695	0	0	0	0	3.4523	0	0	0.666209	7.20922	0	9.64991	0.270034	0	3.80709	0	0.22253	0	0	4.08804	0	3.0245
hsa-miR-5698	0	0	0	0	0	0	0	0	21.6277	0	0	4.05051	0	6.97966	10.1476	0.66759	0.869266	2.65266	0	3.69565	0
hsa-miR-574-5p	0	0	20.5828	0	6.90461	0	0	0	7.20922	0.737813	0	12.9616	0	8.88321	2.25501	2.89289	1.73853	21.2213	0	1.84783	11.4931
hsa-miR-574-3p	0	0	0	4.96396	43.7292	47.5632	11.7791	101.597	25.2323	50.1713	77.1993	82.0904	61.4137	25.3806	44.5365	44.0609	12.1697	47.748	55.1885	46.1957	15.1225
hsa-miR-576-5p	0	46.4151	56.6026	14.8919	14.96	45.4953	0	8.99382	30.6392	7.37813	14.9135	11.3414	15.3534	20.3045	3.94628	10.6814	0	5.30533	2.04402	1.84783	11.4931
hsa-miR-576-3p	0	40.6132	10.2914	34.7477	29.92	0	20.1927	60.625	14.4184	30.2503	46.495	68.0486	64.2925	69.7966	29.3152	63.8661	56.5023	53.0533	42.9244	59.1304	46.5773
hsa-miR-579-5p	0	0	25.7285	0	0	0	0	0	0	2.95125	0	1.62021	9.59589	0	5.63754	1.33518	0	0	0	0	7.2588
hsa-miR-581	0	0	0	0	5.75384	10.3398	0	1.99863	0	14.7563	0	1.35017	0	10.1522	3.38252	6.89843	4.34633	0	22.4842	9.23913	0
hsa-miR-582-3p	0	40.6132	41.1656	14.8919	0	20.6797	0	0	16.2207	5.16469	4.38632	8.37106	22.0706	6.97966	26.4964	1.33518	0	0	6.13206	0	5.4441
hsa-miR-584-5p	921.114	539.575	1276.13	982.864	1090.93	326.739	975.981	2731.79	1283.24	1884.37	1369.41	2622.84	864.59	2337.55	1655.74	3805.04	2314.85	2063.77	2191.19	2374.46	3301.54
hsa-miR-589-5p	0	0	0	0	37.9753	78.5827	90.8672	43.9698	32.4415	84.8484	54.3904	78.3099	39.3432	42.5125	94.1469	42.7258	64.3257	63.6639	73.5847	75.7609	49.6018
hsa-miR-590-3p	0	0	0	0	0	0	0	0	0	9.59156	0	1.08014	3.83836	4.4416	0	5.34072	0	0	0	1.84783	0
hsa-miR-597-3p	0	0	0	0	0	0	0	3.66415	9.01153	0	0	7.83099	0	0	6.76504	0.44506	0	0	0	1.84783	3.0245
hsa-miR-598-3p	0	40.6132	0	14.8919	14.96	23.7816	28.6064	22.318	0	42.7931	25.4407	25.3832	40.3028	6.34515	14.0938	20.9178	10.4312	0	24.5282	22.1739	10.2833
hsa-miR-605-5p	0	0	0	0	0	0	0	0	0	6.64031	0	3.51045	0	0	0	4.00554	0.869266	0	12.2641	5.54348	0
hsa-miR-605-3p	0	17.4056	20.5828	0	0	0	0	9.32693	0	2.95125	9.64991	6.48082	0	6.34515	5.63754	6.6759	1.73853	0	4.08804	5.54348	0
hsa-miR-6087	0	58.0188	0	0	0	0	0	0	54.0692	4.42688	0	0	0	0	0.563754	2.89289	0.869266	2.65266	14.3081	0	6.6539
hsa-miR-610	91.4083	0	0	9.92792	0	28.9515	0	3.66415	0	2.95125	0	4.05051	12.4747	7.61418	3.94628	1.33518	0	7.95799	0	3.69565	0
hsa-miR-6130	0	0	0	34.7477	31.0707	40.3254	11.7791	7.99451	1.80231	19.1831	16.668	14.8519	15.3534	18.4009	20.2951	14.2419	21.7316	10.6107	8.17608	11.087	10.2833
hsa-miR-6131	7.03141	0	0	0	0	21.7137	0	2.66484	3.60461	19.1831	2.63179	1.89024	2.87877	2.53806	9.02006	2.00277	28.6858	15.916	42.9244	70.2174	12.098
hsa-miR-615-3p	35.157	0	25.7285	0	20.7138	1.03398	0	0.666209	16.2207	1.47563	25.4407	4.05051	18.2322	19.67	41.154	9.56879	4.34633	0	14.3081	0	7.2588
hsa-miR-618	0	0	0	0	6.90461	1.03398	0	1.66552	7.20922	0	20.1771	2.97038	13.4343	0	11.8388	0	0	5.30533	0	0	4.8392
hsa-miR-619-5p	0	34.8113	0	0	0	0	0	1.99863	0	0.737813	0	2.97038	6.71713	0	9.02006	3.78301	0	0	4.08804	0	4.2343
hsa-miR-624-5p	0	0	0	0	16.1108	0	0	0	0	0	0	0	0	0	0	0	0	0	0	0	0
hsa-miR-625-5p	0	0	0	0	3.4523	0	0	5.99588	0	8.85375	4.38632	12.4216	0	8.24869	26.4964	20.2502	7.82339	0	6.13206	16.6304	10.2833
hsa-miR-625-3p	506.261	342.311	339.616	153.883	171.464	63.073	5.04818	874.399	263.137	628.616	344.765	881.122	401.108	521.571	2012.04	1558.6	749.307	509.312	545.753	572.826	549.854
hsa-miR-627-5p	0	0	0	0	0	0	0	0	0	0.737813	0	1.08014	0	4.4416	5.07378	0	0	0	0	0	0
hsa-miR-628-5p	0	0	5.14569	0	11.5077	0	0	7.3283	0	9.59156	0	5.94075	20.1514	13.9593	0.563754	8.23361	6.08486	7.95799	4.08804	1.84783	7.8637
hsa-miR-628-3p	0	11.6038	66.894	39.7117	135.791	24.8156	186.783	136.24	151.394	187.404	53.5131	138.798	40.3028	192.258	146.012	155.994	171.245	116.717	165.566	205.109	183.285
hsa-miR-629-5p	562.513	649.811	581.463	784.306	1124.3	1012.27	493.039	295.131	302.787	374.809	592.153	524.677	951.913	364.846	897.496	513.377	145.167	318.32	341.351	279.022	612.158
hsa-miR-636	0	0	0	0	0	8.27187	0	0	0	0	0	2.16027	0	0	0	0	0	0	0	5.54348	6.049
hsa-miR-641	0	0	0	0	0	17.5777	0	32.6442	0	47.22	70.1811	36.4546	26.8685	30.4567	64.8317	39.3878	53.8945	21.2213	65.4086	33.2609	18.147
hsa-miR-642a-3p	0	69.6226	5.14569	9.92792	19.5631	10.3398	0	0.999314	0	0	0	0.270034	3.83836	7.61418	13.5301	2.89289	5.2156	18.5686	0	0	0
hsa-miR-6501-5p	0	0	0	14.8919	8.05538	10.3398	0	0	0	0	0	0	0	0	0	1.33518	0	0	0	0	0
hsa-miR-6503-3p	0	0	0	0	0	0	0	1.66552	0	0	17.5453	3.51045	0	1.26903	5.63754	0.89012	0	0	0	0	0
hsa-miR-6509-5p	0	0	41.1656	0	0	2.06797	0	0	0	2.21344	0	1.08014	0	0	0	1.33518	0	0	0	0	0
hsa-miR-651-5p	0	0	0	19.8558	32.2215	10.3398	0	16.6552	30.6392	3.68906	11.4044	11.3414	68.1308	19.0354	9.02006	27.1487	18.2546	0	0	3.69565	33.2695
hsa-miR-6511a-3p	0	0	0	0	13.8092	11.3738	0	11.3256	0	2.21344	13.159	7.56096	0	6.97966	2.25501	8.9012	17.3853	0	16.3522	33.2609	20.5666
hsa-miR-6511b-3p	133.597	0	0	0	2.30154	0	0	14.3235	1.80231	14.0184	28.0725	13.7717	0	0	2.81877	4.22807	13.039	21.2213	0	16.6304	13.9127
hsa-miR-6513-3p	0	0	0	0	10.3569	0	28.6064	8.32761	41.453	4.42688	4.38632	12.6916	11.5151	3.17257	11.2751	9.12373	14.7775	0	8.17608	5.54348	0
hsa-miR-6514-5p	0	0	0	0	1.15077	0	0	2.66484	0	7.37813	0	4.59058	0	0	2.25501	0	0	7.95799	0	7.39131	4.2343
hsa-miR-6515-5p	0	11.6038	0	0	0	5.16992	30.2891	13.9904	36.0461	5.9025	0	10.5313	9.59589	6.34515	19.1676	17.5799	19.1238	7.95799	4.08804	25.8696	22.9862
hsa-miR-6516-5p	0	0	10.2914	14.8919	0	0	0	3.99725	0	6.64031	7.89538	4.32055	4.79795	17.7664	9.58381	6.89843	2.6078	0	20.4402	18.4783	21.1715
hsa-miR-6516-3p	0	0	0	0	0	0	0	4.33036	0	0	6.14085	3.51045	0	2.53806	0	0.89012	0	0	0	3.69565	0
hsa-miR-652-3p	98.4397	133.443	123.497	109.207	66.7445	174.743	55.53	169.55	145.987	183.715	149.135	212.787	98.8377	164.339	122.898	164.672	126.044	119.37	149.213	177.391	100.413
hsa-miR-654-5p	70.3141	5.80188	149.225	24.8198	23.0154	7.23788	126.204	146.899	14.4184	76.7325	48.2495	86.681	98.8377	18.4009	78.3618	156.884	262.518	66.3166	183.962	170	134.893
hsa-miR-654-3p	105.471	58.0188	36.0199	4.96396	84.0061	33.0875	74.04	461.683	118.952	146.825	123.694	168.231	171.766	129.441	58.6304	212.961	239.917	122.023	114.465	186.63	218.974
hsa-miR-656-3p	0	0	0	0	0	27.9176	0	5.32967	0	0	10.5272	2.16027	11.5151	0	4.51003	3.11542	3.47706	0	0	0	1.2098
hsa-miR-659-5p	0	29.0094	0	0	0	0	3.36545	1.99863	0	1.47563	1.75453	2.16027	7.67671	0	0	1.11265	3.47706	0	0	5.54348	10.2833
hsa-miR-660-5p	0	5.80188	0	19.8558	36.8246	29.9855	3.36545	30.6456	1.80231	19.9209	21.0543	24.5731	62.3733	11.4213	20.8589	8.23361	14.7775	15.916	10.2201	24.0217	6.6539
hsa-miR-664a-5p	0	0	128.642	49.6396	55.2369	37.2234	85.8191	77.6133	75.6968	53.8603	67.5494	99.6426	61.4137	148.476	148.267	107.927	55.633	129.981	44.9684	62.8261	106.462
hsa-miR-664a-3p	0	0	0	0	0	0	0	1.33242	9.01153	0	0	9.4512	0	5.71063	1.69126	1.33518	11.3005	7.95799	30.6603	0	0
hsa-miR-664b-5p	0	0	0	9.92792	0	14.4758	0	8.99382	18.0231	14.7563	0	9.4512	0	0	3.94628	8.23361	46.0711	10.6107	22.4842	9.23913	19.9617
hsa-miR-668-3p	0	0	0	0	0	0	0	0	0	0	14.9135	0	0	0	0	1.33518	9.56192	0	0	0	0
hsa-miR-671-5p	0	0	10.2914	4.96396	0	0	0	2.66484	0	11.0672	21.0543	5.94075	3.83836	24.1116	2.81877	3.33795	18.2546	0	10.2201	9.23913	4.8392
hsa-miR-671-3p	309.382	133.443	77.1854	19.8558	55.2369	61.005	30.2891	371.078	142.382	321.686	225.457	565.452	112.272	288.07	609.982	416.799	647.603	323.625	394.496	506.304	381.087
hsa-miR-6716-3p	0	0	0	9.92792	0	0	0	2.33173	0	7.37813	8.77264	2.97038	0	3.80709	5.63754	8.67867	5.2156	7.95799	10.2201	5.54348	0
hsa-miR-6721-5p	0	0	41.1656	14.8919	3.4523	0	0	24.9828	23.43	67.8788	10.5272	28.0836	8.6363	38.7054	45.6641	21.8079	108.658	79.5799	75.6287	66.5217	27.8254
hsa-miR-6726-3p	0	0	0	0	0	0	0	3.99725	0	2.21344	12.2817	0	0	0	0	0	2.6078	0	0	7.39131	6.049
hsa-miR-6734-5p	0	0	20.5828	0	58.6892	28.9515	0	7.3283	0	15.4941	17.5453	8.37106	31.6664	6.34515	3.94628	4.22807	13.9083	0	2.04402	14.7826	9.07349
hsa-miR-6735-5p	0	0	0	0	0	1.03398	0	1.99863	0	10.3294	0	3.78048	0	0.634515	3.94628	5.78578	0	0	0	0	9.07349
hsa-miR-6736-5p	0	0	0	0	0	0	0	1.33242	0	0	0	5.94075	23.9897	0	2.81877	3.56048	0	0	0	0	0
hsa-miR-6740-5p	0	0	0	0	9.20614	0	0	0	0	0	0	0	6.71713	0	0	0.44506	0	0	0	0	0
hsa-miR-6741-5p	0	40.6132	0	0	13.8092	16.5437	25.2409	51.2981	0	22.1344	21.0543	37.8048	9.59589	3.80709	34.389	44.0609	45.2018	10.6107	73.5847	29.5652	88.9202
hsa-miR-6741-3p	21.0942	0	61.7483	0	42.5784	23.7816	0	55.9616	64.883	27.2991	35.9678	46.4459	13.4343	29.8222	78.3618	98.1357	92.1422	2.65266	59.2766	75.7609	180.865
hsa-miR-6747-3p	70.3141	0	15.4371	0	0	1.03398	0	5.66278	0	0	23.6861	9.4512	0	3.17257	13.5301	2.2253	8.69266	29.1793	12.2641	9.23913	4.2343
hsa-miR-6755-5p	0	0	0	0	0	0	0	0	0	2.21344	0	0	0	0	0	1.55771	0	15.916	0	1.84783	17.5421
hsa-miR-6763-5p	0	0	0	0	8.05538	0	0	6.66209	1.80231	2.21344	0	5.40069	0	3.80709	2.81877	4.89566	0	0	0	0	22.3813
hsa-miR-6764-5p	0	0	36.0199	0	0	0	0	0	0	5.16469	0	1.35017	5.75754	1.90354	3.94628	0.44506	0.869266	5.30533	0	5.54348	2.4196
hsa-miR-6767-5p	0	0	0	0	6.90461	2.06797	0	0	0	12.5428	0	3.51045	0	0	0	1.11265	1.73853	0	0	1.84783	9.07349
hsa-miR-6770-3p	0	0	0	0	0	0	0	1.66552	0	0	0	1.35017	0	3.17257	0	5.56325	8.69266	0	2.04402	0	2.4196
hsa-miR-6772-3p	0	0	0	0	13.8092	0	5.04818	9.66003	0	34.6772	0	18.9024	0	6.97966	37.7715	13.3518	19.9931	5.30533	22.4842	9.23913	13.9127
hsa-miR-6774-3p	0	0	0	0	0	0	0	0	19.8254	0	0	0.810103	0	0	0	0	0	0	0	0	0
hsa-miR-6777-5p	0	0	0	29.7838	0	0	0	0	0	4.42688	0	0.270034	0	0	0	0	7.82339	0	2.04402	0	0
hsa-miR-6780a-5p	0	0	0	19.8558	20.7138	29.9855	0	1.33242	0	0.737813	5.26359	5.67072	0	4.4416	20.2951	2.67036	0	0	2.04402	0	13.3078
hsa-miR-6782-5p	0	0	0	4.96396	9.20614	0	0	0	0	0	0	1.08014	0	0	0	0	0	0	8.17608	0	0
hsa-miR-6786-3p	0	46.4151	0	4.96396	5.75384	0	0	12.9911	0	0	0.877264	2.43031	0	3.17257	0	2.67036	6.08486	0	2.04402	3.69565	15.7274
hsa-miR-6787-3p	0	0	0	0	0	0	0	0	0	1.47563	0	0	0	4.4416	0	0.22253	4.34633	2.65266	0	5.54348	0
hsa-miR-6788-3p	0	34.8113	0	0	0	0	0	0	0	0	0	3.24041	0	0	0	0	0	0	0	0	7.8637
hsa-miR-6793-5p	0	0	0	0	0	0	0	0	0	0.737813	0	1.62021	11.5151	0	2.81877	1.55771	6.95413	0	16.3522	1.84783	0
hsa-miR-6802-5p	0	0	0	4.96396	6.90461	0	0	9.32693	0	4.42688	0	5.94075	0	4.4416	10.1476	5.34072	11.3005	2.65266	22.4842	5.54348	4.8392
hsa-miR-6803-3p	0	40.6132	10.2914	0	5.75384	0	0	6.99519	14.4184	2.21344	21.0543	3.51045	11.5151	0	0	1.78024	9.56192	0	6.13206	1.84783	0
hsa-miR-6804-5p	0	0	30.8742	0	8.05538	0	0	0	0	0	0	0	0	0	2.25501	1.55771	0	0	0	0	0
hsa-miR-6805-5p	0	0	20.5828	19.8558	12.6584	38.2574	0	3.99725	0	3.68906	0	5.13065	8.6363	0	5.07378	3.33795	0	29.1793	10.2201	0	15.1225
hsa-miR-6809-5p	0	0	0	0	0	0	0	5.32967	0	4.42688	0	3.51045	3.83836	0	0	4.00554	6.08486	0	0	0	0
hsa-miR-6810-5p	0	0	0	0	0	0	0	2.99794	0	0	0	3.78048	0	9.51772	0	3.11542	4.34633	0	6.13206	1.84783	0
hsa-miR-6813-5p	0	0	0	9.92792	0	0	0	0	12.6161	1.47563	0	1.08014	0	0	0	7.12096	0	15.916	4.08804	11.087	4.8392
hsa-miR-6815-5p	0	0	10.2914	0	0	4.13593	0	1.66552	0	0	8.77264	1.62021	13.4343	0	6.20129	0.89012	0	0	0	1.84783	9.07349
hsa-miR-6819-5p	0	0	0	0	0	0	18.51	0	0	0	0	2.43031	0	0	0	0.44506	0	0	8.17608	0	2.4196
hsa-miR-6819-3p	0	0	0	0	1.15077	2.06797	0	2.66484	0	4.42688	5.26359	5.67072	0	1.90354	7.89255	7.56602	14.7775	0	0	9.23913	7.8637
hsa-miR-6825-5p	0	0	0	0	0	0	0	4.66346	0	5.16469	0	0.270034	3.83836	0	0	0	0	0	0	0	8.46859
hsa-miR-6826-3p	0	0	0	0	12.6584	0	0	0	3.60461	6.64031	0	0.540069	0	0	0	2.89289	0	0	0	0	0
hsa-miR-6832-5p	0	0	0	0	0	0	0	0	0	2.21344	11.4044	0	0	1.90354	0	0	0	0	0	0	0
hsa-miR-6837-3p	0	0	0	0	10.3569	0	0	6.66209	0	0.737813	0	8.37106	0	0	19.1676	6.23084	6.08486	0	0	3.69565	7.8637
hsa-miR-6842-5p	0	0	0	0	19.5631	0	0	5.32967	5.40692	25.8234	20.1771	14.0418	6.71713	8.88321	15.7851	16.0222	1.73853	0	47.0124	25.8696	26.6156
hsa-miR-6842-3p	0	0	25.7285	0	6.90461	1.03398	33.6545	66.6209	27.0346	32.4638	0	49.4163	9.59589	50.1267	99.2207	57.1902	96.4885	58.3586	77.6727	107.174	107.067
hsa-miR-6843-3p	0	0	0	0	0	0	0	2.99794	0	0	7.89538	1.62021	0	0	0	2.00277	5.2156	0	0	0	0.6049
hsa-miR-6847-5p	0	0	0	0	0	0	0	1.33242	9.01153	5.16469	0	2.16027	0	0	1.12751	5.34072	9.56192	0	8.17608	0	0
hsa-miR-6850-5p	0	11.6038	0	0	0	0	0	1.99863	0	0	0	0.810103	0	0	0	0	0	0	0	7.39131	1.2098
hsa-miR-6852-5p	0	0	0	9.92792	13.8092	11.3738	0	147.232	55.8715	117.312	27.1952	151.489	24.9493	70.4311	57.5029	89.012	60.8486	61.0113	138.993	92.3913	123.4
hsa-miR-6852-3p	0	0	10.2914	0	0	0	0	0.999314	0	1.47563	0	2.70034	0	0	0	2.00277	7.82339	2.65266	0	0	0
hsa-miR-6855-5p	0	11.6038	0	0	6.90461	0	0	3.33105	0	7.37813	2.63179	1.35017	0.959589	5.71063	1.12751	3.78301	6.08486	0	0	0	7.8637
hsa-miR-6855-3p	0	0	0	0	0	2.06797	0	5.99588	0	4.42688	11.4044	4.05051	4.79795	0	0	4.89566	1.73853	0	0	0	3.0245
hsa-miR-6859-5p	0	0	0	0	0	14.4758	0	1.99863	0	2.21344	0	4.86062	0	0	3.94628	7.78855	10.4312	0	0	5.54348	0
hsa-miR-6862-5p	0	0	0	0	0	0	0	1.33242	0	8.11594	16.668	7.56096	0	0	2.25501	2.67036	5.2156	18.5686	2.04402	1.84783	0
hsa-miR-6865-5p	0	0	0	0	0	0	0	0	0	0	0	1.35017	0	0	6.20129	1.33518	0	0	0	0	1.2098
hsa-miR-6866-5p	0	0	0	0	0	15.5098	1.68273	3.99725	25.2323	2.95125	0.877264	6.21079	6.71713	11.4213	15.7851	11.7941	6.08486	0	0	3.69565	5.4441
hsa-miR-6873-3p	0	34.8113	0	0	1.15077	11.3738	0	0	1.80231	4.42688	0	10.2613	0	0	3.38252	1.11265	0	0	12.2641	14.7826	7.2588
hsa-miR-6877-5p	0	0	20.5828	9.92792	19.5631	0	0	10.6593	0	6.64031	0	5.40069	6.71713	0	18.6039	7.78855	11.3005	0	10.2201	7.39131	5.4441
hsa-miR-6881-3p	0	0	0	0	0	0	0	0.999314	0	1.47563	7.01811	0	0	0	0	0.22253	0	0	0	0	5.4441
hsa-miR-6882-5p	0	0	0	0	0	0	0	2.66484	0	0	0	2.16027	0	0	0	0.22253	0	7.95799	12.2641	0	2.4196
hsa-miR-6891-5p	0	0	0	0	0	0	0	6.66209	0	0	0	4.59058	0	0	2.25501	0	8.69266	0	0	0	6.6539
hsa-miR-7-5p	2636.78	1595.52	1276.13	456.684	1645.6	3834.01	1583.45	613.245	737.143	1235.1	1306.25	978.604	815.651	942.254	1960.17	1408.39	774.516	960.264	985.217	850	701.684
hsa-miR-708-3p	0	0	0	0	11.5077	10.3398	0	0	0	3.68906	0	0	0	1.26903	15.2214	2.89289	0	0	0	0	0
hsa-miR-7107-3p	14.0628	29.0094	10.2914	0	0	0	0	0	0	0	0	0	0	0	0	0	0	0	0	0	0
hsa-miR-7110-3p	0	0	0	0	0	0	0	30.3125	0	2.95125	5.26359	4.86062	2.87877	6.34515	12.4026	7.12096	15.6468	26.5266	0	1.84783	4.8392
hsa-miR-7113-5p	0	0	0	0	0	0	0	1.99863	0	4.42688	0	0.540069	0	2.53806	1.69126	1.55771	0	0	8.17608	3.69565	14.5176
hsa-miR-744-5p	1568	1595.52	2994.79	1151.64	2117.41	1744.33	2344.04	8757.98	4031.76	5144.77	4883.73	10007.5	2507.41	5380.68	7496.23	8077.62	18101.6	8464.65	10675.9	11767	15999
hsa-miR-758-3p	28.1256	0	0	0	0	17.5777	0	16.9883	16.2207	5.16469	3.50906	2.97038	3.83836	8.24869	10.1476	15.7996	25.2087	0	10.2201	11.087	9.67839
hsa-miR-760	14.0628	0	30.8742	9.92792	33.3723	9.30585	3.36545	140.237	36.0461	76.7325	60.5312	130.427	55.6562	64.7205	91.8919	95.6879	135.605	87.5379	136.949	177.391	290.352
hsa-miR-7641	450.01	104.434	406.51	29.7838	25.3169	12.4078	42.0682	4.33036	32.4415	18.4453	50.0041	4.59058	18.2322	13.9593	20.8589	4.22807	6.95413	45.0953	12.2641	11.087	58.0704
hsa-miR-766-5p	0	0	36.0199	19.8558	20.7138	1.03398	79.0881	78.2796	97.3245	99.6047	43.8632	113.684	30.7069	71.0656	105.986	95.0203	123.436	18.5686	112.421	145.978	151.225
hsa-miR-766-3p	0	0	0	0	0	0	0	14.6566	0	15.4941	0	26.4634	2.87877	12.6903	20.2951	15.5771	14.7775	29.1793	16.3522	16.6304	10.8882
hsa-miR-769-5p	0	34.8113	0	44.6756	79.403	71.3449	38.7027	160.556	189.242	129.117	107.904	125.026	127.625	124.999	146.012	129.29	118.22	39.79	130.817	83.1522	93.1545
hsa-miR-7704	0	0	0	0	10.3569	0	0	4.99657	19.8254	0.737813	0	1.35017	0	3.80709	0	0	0	0	0	0	8.46859
hsa-miR-7706	77.3455	52.2169	118.351	4.96396	77.1015	118.908	53.8472	50.2988	5.40692	35.415	141.24	21.0627	70.05	23.477	56.9391	42.2807	64.3257	23.874	61.3206	66.5217	76.2174
hsa-miR-7848-3p	35.157	0	0	0	0	0	0	18.6539	0	19.9209	0	15.392	6.71713	1.90354	17.4764	11.349	24.3394	0	18.3962	9.23913	6.6539
hsa-miR-7849-3p	0	0	0	0	11.5077	11.3738	0	4.33036	0	16.9697	4.38632	8.6411	0	4.4416	10.1476	8.45614	26.078	7.95799	12.2641	14.7826	12.7029
hsa-miR-7854-3p	0	0	0	4.96396	0	38.2574	0	15.989	9.01153	15.4941	14.0362	18.6324	14.3938	13.3248	9.58381	22.9206	32.1628	21.2213	30.6603	27.7174	18.147
hsa-miR-7976	0	11.6038	0	0	27.6184	8.27187	45.4336	12.9911	45.0576	4.42688	20.1771	5.94075	11.5151	12.0558	15.2214	13.3518	0	0	2.04402	0	7.2588
hsa-miR-7977	0	0	20.5828	0	0	0	0	5.32967	0	0	0	1.35017	0	0	0	0.44506	0.869266	0	0	1.84783	5.4441
hsa-miR-873-5p	0	0	0	0	24.1661	0	0	1.66552	1.80231	0	0	0.270034	16.313	0	0	0	0	0	0	0	0
hsa-miR-874-3p	0	0	10.2914	0	27.6184	26.8836	0	17.3214	14.4184	48.6956	26.3179	13.7717	16.313	38.7054	22.5501	20.0277	39.117	34.4846	59.2766	27.7174	7.8637
hsa-miR-877-5p	133.597	58.0188	319.033	19.8558	112.775	24.8156	99.2809	144.567	28.8369	86.3241	100.008	100.993	57.5754	75.5072	134.737	176.466	371.177	183.034	212.578	214.348	362.94
hsa-miR-877-3p	0	0	0	0	0	0	0	4.33036	19.8254	2.21344	0	7.56096	0	6.34515	0.563754	0.89012	0	15.916	0	14.7826	0.6049
hsa-miR-885-5p	0	0	0	4.96396	79.403	14.4758	0	13.9904	171.219	18.4453	57.0222	8.6411	38.3836	13.3248	17.4764	20.0277	19.9931	23.874	61.3206	27.7174	42.343
hsa-miR-885-3p	0	0	0	4.96396	0	0	0	4.66346	28.8369	0	0	4.05051	3.83836	6.97966	0	3.11542	0	0	0	7.39131	1.8147
hsa-miR-887-5p	0	0	0	0	0	0	8.41363	0	0	0	7.89538	0	0	0	0	0	0	0	0	0	0
hsa-miR-889-3p	0	0	20.5828	49.6396	17.2615	0	1.68273	59.6257	21.6277	53.8603	1.75453	34.8344	69.0904	10.7867	19.7314	48.9566	41.7248	47.748	79.7168	44.3478	45.9724
hsa-miR-9-5p	0	46.4151	82.3311	89.3513	11.5077	16.5437	0	25.3159	109.941	88.5375	0	59.9476	40.3028	41.2435	37.2077	45.1736	13.039	100.801	40.8804	42.5	33.2695
hsa-miR-9-3p	0	0	0	14.8919	10.3569	0	0	0	23.43	10.3294	0	3.78048	30.7069	10.7867	13.5301	10.2364	0	0	12.2641	14.7826	7.2588
hsa-miR-92a-1-5p	0	116.038	0	0	58.6892	20.6797	31.9718	4.66346	68.4876	9.59156	12.2817	9.72123	13.4343	22.8425	14.6576	8.67867	14.7775	29.1793	32.7043	5.54348	16.3323
hsa-miR-92a-3p	55302	63478.4	76516.5	59766.1	70349.9	82817.9	47107.9	33602.9	25774.8	30014.2	46619.6	39536.5	38108.2	29031	38346	33104.2	25249.6	31444.7	27939.7	27623.2	37717.9
hsa-miR-92b-5p	105.471	220.472	149.225	89.3513	172.615	79.6167	97.5981	44.636	46.8599	91.4888	138.608	55.357	96.9185	74.8727	75.543	32.9344	60.8486	76.9273	151.257	64.6739	55.0459
hsa-miR-92b-3p	189.848	429.339	308.742	223.378	372.849	258.496	149.763	509.65	326.217	446.377	254.407	567.882	324.341	277.917	374.332	588.369	390.3	342.194	643.866	646.739	478.476
hsa-miR-93-5p	506.261	667.216	761.563	536.108	966.645	1151.86	619.243	816.439	897.548	1110.41	996.572	762.577	1285.85	897.204	437.473	765.058	772.777	793.147	619.338	813.044	817.824
hsa-miR-93-3p	0	52.2169	0	0	10.3569	53.7671	37.02	16.6552	0	33.2016	21.9316	18.3623	19.1918	25.3806	16.3489	17.5799	5.2156	0	0	18.4783	9.67839
hsa-miR-933	0	0	0	0	0	0	0	0.333105	0	2.21344	10.5272	1.62021	0	0	0	0	6.08486	0	10.2201	0	0
hsa-miR-937-3p	0	0	25.7285	0	6.90461	0	0	4.33036	0	2.21344	0	11.3414	0	1.90354	4.51003	4.67313	7.82339	0	0	0	12.098
hsa-miR-939-5p	56.2513	0	46.3112	0	2.30154	17.5777	0	9.99314	12.6161	9.59156	66.6721	16.2021	37.424	17.1319	18.6039	12.6842	49.5482	0	59.2766	27.7174	69.5635
hsa-miR-941	302.35	75.4245	344.761	54.6036	214.043	156.131	95.9154	96.6003	102.731	133.544	348.274	300.818	177.524	158.629	252.562	192.934	199.931	119.37	216.666	195.87	324.226
hsa-miR-942-5p	91.4083	92.8301	159.517	84.3873	90.9107	81.6847	38.7027	57.6271	16.2207	70.0922	78.0765	71.019	91.161	57.1063	50.1741	68.5392	41.7248	42.4426	98.1129	44.3478	87.7104
hsa-miR-95-3p	0	63.8207	15.4371	29.7838	148.449	45.4953	23.5582	8.32761	86.5107	16.2319	62.2858	8.37106	44.1411	35.5328	27.0602	2.2253	0	31.832	22.4842	0	18.7519
hsa-miR-96-5p	253.131	0	92.6225	9.92792	172.615	100.296	26.9236	3.66415	0	15.4941	28.0725	4.86062	43.1815	0	11.8388	5.11819	6.95413	0	42.9244	18.4783	26.6156
hsa-miR-98-5p	1040.65	1009.53	1049.72	491.432	733.039	1144.62	740.4	1276.12	1326.5	2397.15	1043.94	1449	899.135	2015.22	1424.04	1636.04	1784.6	1771.98	1860.06	2067.72	1050.11
hsa-miR-98-3p	0	0	0	0	0	0	0	3.66415	0	7.37813	0	4.59058	6.71713	0	0	3.56048	8.69266	0	0	11.087	0
hsa-miR-99a-5p	5470.43	4438.44	4641.42	2665.65	7302.77	6376.58	3823.15	1825.41	4909.48	2186.14	6719.84	2699.26	5531.07	3810.9	3699.35	1697.24	1215.23	3384.8	2148.26	1080.98	1861.88
hsa-miR-99b-5p	2018.01	2100.28	1420.21	1245.95	2573.12	2295.44	1889.7	1980.97	1845.56	2096.86	2162.46	3135.37	1584.28	1967	1832.2	1539.24	1921.08	1612.82	2336.31	2409.57	790.604
hsa-miR-99b-3p	0	104.434	20.5828	14.8919	31.0707	64.107	35.3373	36.9746	43.2553	22.8722	14.0362	91.2716	23.9897	40.6089	36.0802	30.0416	33.0321	13.2633	69.4967	70.2174	41.1332

## Sheet: Supplementary Table 4
DE miRNAs between Healthy individuals samples and NSCLC patient samples
DE miRNA	logFC	logCPM	PValue	FDR
hsa-miR-146a-5p	2.11132	12.6368	4.67e-15	3.24e-12
hsa-miR-199a-5p	2.30377	11.3493	2.08e-13	6.96e-11
hsa-miR-144-3p	-2.86931	9.84496	3.01e-13	6.96e-11
hsa-miR-339-5p	2.80914	7.79316	1.88e-11	2.88e-09
hsa-miR-363-3p	-2.00229	10.4121	2.26e-11	2.88e-09
hsa-miR-224-5p	2.46283	9.70251	2.49e-11	2.88e-09
hsa-miR-222-3p	1.91983	12.707	5.77e-11	5.37e-09
hsa-miR-1301-3p	2.21861	8.87525	6.19e-11	5.37e-09
hsa-miR-1307-3p	1.8367	11.8475	1.64e-10	1.27e-08
hsa-miR-744-5p	2.16189	12.6456	5.89e-10	3.28e-08
hsa-miR-183-5p	-2.56443	9.8875	5.95e-10	3.28e-08
hsa-let-7b-5p	-1.60491	15.6829	6.08e-10	3.28e-08
hsa-miR-21-5p	1.44209	15.0256	6.14e-10	3.28e-08
hsa-miR-221-3p	1.93179	10.5863	9.23e-10	4.58e-08
hsa-miR-144-5p	-2.4841	8.88801	1.29e-09	5.97e-08
hsa-miR-6852-5p	3.76512	5.95584	1.79e-09	7.75e-08
hsa-miR-24-3p	1.39532	12.6795	1.35e-08	5.5e-07
hsa-miR-150-3p	-2.07429	6.92663	2.51e-08	9.2e-07
hsa-miR-328-3p	2.03711	11.2497	2.52e-08	9.2e-07
hsa-miR-106a-5p	-3.00915	6.6529	4.11e-08	1.36e-06
hsa-miR-484	1.44543	10.4913	6.74e-08	2.03e-06
hsa-miR-182-5p	-1.97861	10.1194	1.09e-07	3.16e-06
hsa-miR-423-3p	1.48355	13.6932	1.37e-07	3.73e-06
hsa-miR-760	2.9206	6.36235	1.52e-07	3.92e-06
hsa-miR-28-3p	1.24705	10.2629	1.92e-07	4.6e-06
hsa-miR-148b-3p	1.31928	10.6655	2.21e-07	5.12e-06
hsa-miR-4433b-5p	2.09862	10.0286	2.32e-07	5.19e-06
hsa-miR-199b-3p	1.33085	9.6727	3.04e-07	6.6e-06
hsa-miR-199a-3p	1.33085	9.6727	3.18e-07	6.69e-06
hsa-miR-1260b	3.43027	5.73257	4e-07	8.17e-06
hsa-miR-92a-3p	-0.977087	15.4169	5.73e-07	1.14e-05
hsa-miR-221-5p	2.87716	6.8025	1.2e-06	2.31e-05
hsa-miR-197-3p	2.52329	7.4454	1.75e-06	3.28e-05
hsa-miR-151a-3p	1.38526	14.2358	3.44e-06	6.29e-05
hsa-miR-7641	-2.81947	5.99889	3.54e-06	6.3e-05
hsa-miR-3120-3p	3.49417	5.12736	4.25e-06	7.37e-05
hsa-miR-191-5p	1.1715	12.7081	4.41e-06	7.46e-05
hsa-miR-342-5p	-1.23104	9.19491	6.99e-06	0.000110421
hsa-miR-1908-5p	2.42322	8.97917	7e-06	0.000110421
hsa-miR-128-3p	1.27719	12.5007	8.37e-06	0.000127941
hsa-miR-100-5p	-2.27447	10.5341	8.48e-06	0.000127941
hsa-miR-191-3p	2.92958	5.25381	9.93e-06	0.000143631
hsa-miR-26a-5p	1.04534	16.1231	1.06e-05	0.000150531
hsa-miR-130b-5p	1.96908	7.885	1.29e-05	0.00017866
hsa-miR-151a-5p	1.99578	6.63925	1.62e-05	0.000219263
hsa-miR-3138	2.77841	6.229	1.67e-05	0.000219263
hsa-miR-584-5p	1.33296	10.778	1.67e-05	0.000219263
hsa-miR-151b	1.99026	6.63423	1.76e-05	0.000225978
hsa-miR-184	-3.05664	4.94536	2.02e-05	0.000252175
hsa-miR-1273h-3p	2.40684	7.27851	2.03e-05	0.000252175
hsa-miR-671-3p	2.00125	8.16423	2.12e-05	0.000257556
hsa-miR-28-5p	1.54213	7.64277	2.35e-05	0.000280772
hsa-miR-641	3.3539	4.85646	2.48e-05	0.00029222
hsa-miR-223-5p	1.20691	10.2878	2.59e-05	0.000300144
hsa-miR-451a	-1.51987	14.9496	2.96e-05	0.000331212
hsa-miR-330-3p	1.78752	8.75892	3.27e-05	0.000359694
hsa-miR-4446-3p	2.31221	8.41189	3.74e-05	0.000405164
hsa-miR-3177-3p	3.63986	4.7679	4.3e-05	0.000456952
hsa-miR-101-3p	-1.13169	12.387	5.28e-05	0.000546458
hsa-miR-4326	2.3596	5.32758	5.9e-05	0.00060182
hsa-miR-5189-5p	2.83218	4.0529	9.53e-05	0.000931532
hsa-miR-486-5p	-1.14047	16.9885	9.85e-05	0.000949293
hsa-miR-150-5p	-1.60806	9.13235	0.000104952	0.000997764
hsa-miR-1180-3p	-1.37925	7.48008	0.000117525	0.0011022
hsa-miR-155-5p	-1.30336	9.64695	0.00020371	0.0018125
hsa-miR-223-3p	1.92969	8.28175	0.000219867	0.00193149
hsa-miR-654-3p	1.64523	7.11525	0.000226101	0.00196143
hsa-miR-96-5p	-2.66208	5.37125	0.000310083	0.00253799
hsa-miR-145-5p	-3.66405	4.16583	0.000341989	0.00272805
hsa-miR-323a-3p	2.78234	5.42626	0.000410183	0.00312821
hsa-miR-4732-3p	-1.58524	6.43731	0.000418982	0.00316058
hsa-miR-425-3p	2.1594	6.27369	0.000443454	0.00330922
hsa-miR-26b-3p	2.05119	5.15457	0.000584403	0.00426366
hsa-miR-501-3p	-1.3217	6.96476	0.000589786	0.00426366
hsa-miR-16-5p	-0.863074	9.56053	0.000627521	0.00444387
hsa-miR-548j-5p	2.01633	6.13488	0.000640715	0.00449148
hsa-miR-379-5p	1.2139	7.31209	0.000696512	0.00478868
hsa-miR-4665-5p	2.08892	5.36344	0.000696912	0.00478868
hsa-miR-30a-3p	-0.918153	7.89658	0.000735713	0.00500573
hsa-miR-625-3p	1.73682	9.15983	0.000834879	0.00559546
hsa-miR-25-3p	-0.8006	13.1871	0.000838513	0.00559546
hsa-miR-3158-3p	-1.65679	5.19024	0.000863469	0.00565595
hsa-miR-16-2-3p	-0.834203	10.9306	0.000863878	0.00565595
hsa-miR-210-3p	2.08209	5.15735	0.000965746	0.00620581
hsa-miR-340-5p	0.93584	9.56542	0.00113448	0.00722319
hsa-miR-6842-3p	2.54449	5.50315	0.00117302	0.00733402
hsa-miR-134-5p	1.21542	7.91894	0.00130844	0.00810767
hsa-miR-485-3p	2.07423	6.33005	0.00152386	0.00911688
hsa-miR-181a-2-3p	1.01542	6.95896	0.00157064	0.00931644
hsa-miR-769-5p	1.57066	6.58879	0.00167362	0.00984314
hsa-miR-766-5p	1.9668	6.1493	0.00170834	0.00996291
hsa-miR-409-3p	1.26733	10.4237	0.00173334	0.0100245
hsa-miR-340-3p	1.72986	7.67389	0.00185373	0.0104837
hsa-miR-98-5p	0.820816	10.3912	0.00187644	0.010502
hsa-miR-4732-5p	-1.42216	6.7328	0.00193874	0.0106785
hsa-miR-10a-5p	-0.944529	12.4192	0.00202149	0.0110417
hsa-miR-425-5p	0.758442	9.80874	0.00212269	0.0114197
hsa-miR-326	2.50116	4.5421	0.00216209	0.0115422
hsa-miR-382-5p	1.15637	7.53063	0.00220956	0.0117056
hsa-let-7a-5p	-0.638131	15.1432	0.0023397	0.0122087
hsa-miR-22-5p	1.22414	7.24846	0.00243714	0.0125287
hsa-miR-10b-5p	-1.26268	13.3694	0.00251479	0.0128328
hsa-miR-6721-5p	2.56553	5.11307	0.0025655	0.012996
hsa-miR-18a-5p	1.60227	5.09485	0.00264473	0.0133003
hsa-miR-32-5p	-0.904132	6.80596	0.00290429	0.0144299
hsa-miR-23a-3p	1.16051	7.79171	0.003009	0.014706
hsa-miR-152-3p	0.838603	8.60872	0.00318598	0.015462
hsa-miR-125a-5p	-0.811086	11.877	0.00324344	0.0156316
hsa-miR-7-5p	-0.877196	10.3457	0.00349849	0.0166298
hsa-miR-142-5p	-0.836704	11.4296	0.00387847	0.0180648
hsa-miR-130a-3p	2.01347	4.78929	0.00391247	0.0181017
hsa-miR-1-3p	-1.78544	7.07502	0.00402613	0.0184301
hsa-miR-30a-5p	-0.914387	9.72182	0.00408965	0.0185045
hsa-miR-361-3p	0.824722	8.95804	0.00410619	0.0185045
hsa-miR-330-5p	1.98989	4.51989	0.00418464	0.0187364
hsa-miR-381-3p	1.16196	7.73113	0.00536753	0.023137
hsa-miR-127-3p	0.99046	8.61142	0.00552555	0.0235126
hsa-miR-1306-5p	2.09113	4.00495	0.00553727	0.0235126
hsa-miR-421	1.55883	5.78544	0.00585873	0.0244801
hsa-let-7d-3p	0.730633	11.8479	0.00589076	0.0244801
hsa-miR-543	1.08323	8.66189	0.00638531	0.0262213
hsa-miR-136-3p	-2.17289	4.08364	0.00651084	0.0265795
hsa-miR-335-3p	1.04413	7.09372	0.00655445	0.0266011
hsa-miR-342-3p	-0.949327	6.30016	0.00734731	0.0289718
hsa-miR-195-3p	-1.82095	4.67965	0.00806153	0.0312553
hsa-miR-2355-3p	1.88531	4.59783	0.00855538	0.0326233
hsa-miR-1292-5p	1.44303	5.18266	0.00872358	0.0330829
hsa-miR-19b-3p	1.03283	6.53974	0.00882358	0.0332802
hsa-miR-126-5p	0.883264	9.85271	0.0095243	0.0355369
hsa-miR-345-5p	1.48221	5.61773	0.0100788	0.0372344
hsa-miR-30e-5p	0.621644	11.4554	0.010166	0.0373292
hsa-miR-29b-3p	-1.60827	4.49683	0.0120574	0.0435827
hsa-miR-185-3p	1.45523	6.2994	0.0122609	0.043989
hsa-miR-192-5p	-0.897669	11.2345	0.0122966	0.043989
hsa-miR-27a-5p	-1.23113	6.09096	0.0129282	0.0457765
hsa-miR-576-3p	1.39258	5.39408	0.0142756	0.0500367
hsa-miR-370-3p	1.39621	7.79712	0.0152796	0.0531611
hsa-miR-140-5p	0.781166	7.84575	0.0165883	0.0562066
hsa-miR-574-3p	1.45444	5.33404	0.0166332	0.0562066
hsa-miR-331-3p	1.9597	4.52913	0.0175589	0.058028
hsa-miR-125b-2-3p	-1.87414	4.24795	0.0188024	0.0605363
hsa-miR-1294	-1.24391	4.73177	0.0199924	0.063355
hsa-miR-92b-3p	0.672488	8.59632	0.0213793	0.0671368
hsa-miR-30d-5p	0.53193	14.0534	0.0219593	0.0686475
hsa-miR-107	-0.740541	8.6701	0.0227936	0.0709362
hsa-miR-92b-5p	-0.780256	6.57339	0.0234695	0.0723903
hsa-miR-339-3p	1.04221	6.97726	0.0238682	0.0732945
hsa-miR-23b-3p	0.941662	7.6582	0.0241436	0.073348
hsa-miR-99a-5p	-0.704113	11.8485	0.0241968	0.073348
hsa-miR-889-3p	1.74214	5.07783	0.0242027	0.073348
hsa-miR-629-5p	-0.683987	9.12713	0.0276103	0.0818871
hsa-miR-148a-5p	1.37299	6.19537	0.0289009	0.0846298
hsa-miR-628-3p	1.07922	6.92522	0.0337706	0.0952717
hsa-miR-432-5p	0.851585	7.60406	0.0359169	0.098914
